# Supplementary material
Source: PubMed Central journal article supplement (PMC4732939)
Supplement: NIHMS702973-supplement-01.pdf [file NIHMS702973-supplement-01.pdf]

## Supplementary Methods

### *Lamina Propria Lymphocyte Isolation*

Colonic lamina propria (LPL) cells were isolated from resections using a slightly modified protocol as described <sup>1</sup>. In brief, tissue was digested overnight using collagenase A (Roche, West Sussex, UK). Digested cells were layered on a 40/80% Percoll gradient (GE Healthcare, Buckinghamshire, UK), centrifuged and LPLs collected. For cell isolation from biopsies, biopsies were digested with collagenase A followed by mechanical disruption (GentleMACS, Miltenyi Biotec, Surrey, UK) and used directly.

### *Quantitative PCR*

CD8+ T cells were enriched from PBMCs using CD8 Microbeads (Miltenyi Biotec). Cells were stimulated with cell stimulation cocktail (eBioscience, Hatfield, UK) for various lengths of time. Total RNA was subsequently extracted using RNeasy Micro or Mini RNA extraction kits (Qiagen, Manchester, UK). cDNA was synthesised using Superscript III Reverse Transcriptase (Invitrogen, Life Technologies, Paisley, UK) and resulting cDNA mixed with Faststart universal probe master (Roche), primers and the corresponding universal probe (Roche). Primers were: HPRT 3'-tgaccttgattattttgcatacc-5' and 5'-cgagcaagacgttcagtct-3', with probe number 73; IFN $\gamma$  3'-tgaaagaggagagtgcagaaa-5' and 5'-ttggatgctctggcatcttt-3' with probe number 21. Samples were run on the Lightcycler 480 (Roche) on the following cycle: 95°C for 10 min, 45 cycles of 95°C for 5min, 60°C for 30 seconds, 72°C for 10 seconds, and one cycle of 40°C for 10 seconds. Fold change was normalised to expression of the housekeeping

gene HPRT using the  $2^{-\Delta\Delta CT}$  method <sup>2</sup> and calculated relative to unstimulated samples.

### Supplementary References

1. Geremia A, Arancibia-Cárcamo C V, Fleming MPP, et al. IL-23-responsive innate lymphoid cells are increased in inflammatory bowel disease. *J Exp Med*. 2011;208(6):1127-33. doi:10.1084/jem.20101712.
2. Livak KJ, Schmittgen TD. Analysis of relative gene expression data using real-time quantitative PCR and the  $2^{-(\Delta\Delta C(T))}$  Method. *Methods*. 2001;25(4):402-8. doi:10.1006/meth.2001.1262.

### Supplementary Figure Legends

Figure S1: Expression of NK cell markers by CD161-defined CD8<sup>+</sup> T cell subsets. Representative flow cytometry plots and cumulative data for percentage of CD8<sup>+</sup>CD3<sup>+</sup> lymphocytes, excluding CCR7<sup>+</sup>CD45RA<sup>+</sup> naïve cells, expressing CD56 (A), CD16 (B), CD160 (C), CD244 (D), NKp80 (E) and KLRG1 (F). A representative plot of CD3<sup>-</sup> lymphocytes, including CD161<sup>+</sup> NK cells, is shown for comparison. \*\*p<0.01, \*p<0.05, ns = not significant by one-way ANOVA with Tukey's multiple comparisons test. Data are represented as mean ± SEM.

Figure S2: CD161 expressing CD8<sup>+</sup> T cell subsets in tissue. A) Percentage of memory CD8<sup>+</sup> T cells expressing CD161 in control colon biopsies (adjacent normal tissue from surgery for colorectal cancer; n=10), compared to biopsies from patients with Inflammatory Bowel Disease (IBD) from either inflamed or non-inflamed tissue (matched) (n=7), as judged by the physician performing the procedure. Also, in comparison to biopsies from IBD patients with quiescent disease and no signs of colonic inflammation (non-inflamed; n=8). Box and whiskers show min to max values. \*\*p<0.01, ns = not significant by one-way ANOVA with Tukey's multiple comparisons test, or \*\*\*p<0.001 by paired t-test between matched inflamed and non-inflamed tissue biopsies. B) Percentage of

CD161<sup>+</sup> memory T cells in control colon biopsies (adjacent normal tissue from surgery for colorectal cancer; n=10), compared to biopsies with patients IBD divided into either Ulcerative Colitis (UC) (n=6) or Crohn's Disease (CD) (n=6). Box and whiskers show min to max values. \*p<0.05, ns = not significant by one-way ANOVA with Tukey's multiple comparisons test. C) Percentage of CD161<sup>+</sup>V $\alpha$ 7.2<sup>+</sup> CD3<sup>+</sup> cells from adult peripheral blood (n=10), liver (n=3) and colon (n=12) which were CD8<sup>-</sup>CD4<sup>-</sup> (DN), CD8<sup>+</sup>CD4<sup>-</sup>, CD8<sup>-</sup>CD4<sup>+</sup> or CD8<sup>+</sup>CD4<sup>+</sup> (DP). Data are represented as mean  $\pm$  SEM.

Figure S3: Analysis of anti-viral cells, and of stimulated CD161<sup>int</sup>CD8<sup>+</sup> T cells by microarray. A) Percentage of the CD161<sup>neg</sup> or CD161<sup>int</sup> CD8<sup>+</sup> T cell populations specific for each virus (n=5). ns = not significant by paired t-test. B) Relative expression of IFN $\gamma$  by CD8<sup>+</sup> T cells stimulated with PMA + ionomycin for 2,4 or 6hrs compared to unstimulated controls. Expression was normalised to that of HPRT in all samples. Each donor is represented by a separate line, with each data point displaying the average of triplicate wells. This identified 4hrs as the optimal duration for stimulation for subsequent detection of cytokines by microarray. C) Scatter plots of signal intensities of all mRNA probes in stimulated (y axis) vs. unstimulated (x axis) CD161<sup>neg</sup>CD8<sup>+</sup> T cells (left), and stimulated CD161<sup>int</sup> (y axis) vs. stimulated CD161<sup>neg</sup> (x axis) CD8<sup>+</sup> T cells (right). The signal intensities of each probe represented by a cross are shown in double logarithmic scale. Red diagonal lines define the areas of 2-fold differential signal intensities. Blue cross: unchanged genes, red cross: significantly upregulated genes (p<0.01), green cross: significantly downregulated genes (p<0.01).

Table S1: Gene expression of resting CD161<sup>int</sup>CD8<sup>+</sup> T cells. CD161<sup>int</sup>CD8<sup>+</sup> T cells sorted from adult peripheral blood were analysed by mRNA microarray, and gene expression compared to CD161<sup>neg</sup>CD8<sup>+</sup> T cells from the same donors. Genes with a fold change >2 and p-value <0.01 are listed. CD161 is encoded by KLRB1.

Table S2: Significantly differentially expressed cytokines and chemokines by CD161<sup>int</sup>CD8<sup>+</sup> T cells upon stimulation. Gene expression of PMA + ionomycin stimulated CD161<sup>int</sup>CD8<sup>+</sup> T cells compared to unstimulated cells. Those genes encoding cytokines and chemokines with a fold change >2 and p-value <0.01 are summarised.

Table S3: Genes significantly differentially expressed by stimulated CD161<sup>int</sup>CD8<sup>+</sup> T cells compared to stimulated CD161<sup>neg</sup>CD8<sup>+</sup> T cells. Genes expressed by PMA + ionomycin stimulated CD161<sup>int</sup>CD8<sup>+</sup> T cells, with a fold change >2 and p-value <0.01 when compared to stimulated CD161<sup>neg</sup>CD8<sup>+</sup> T cells, are listed.

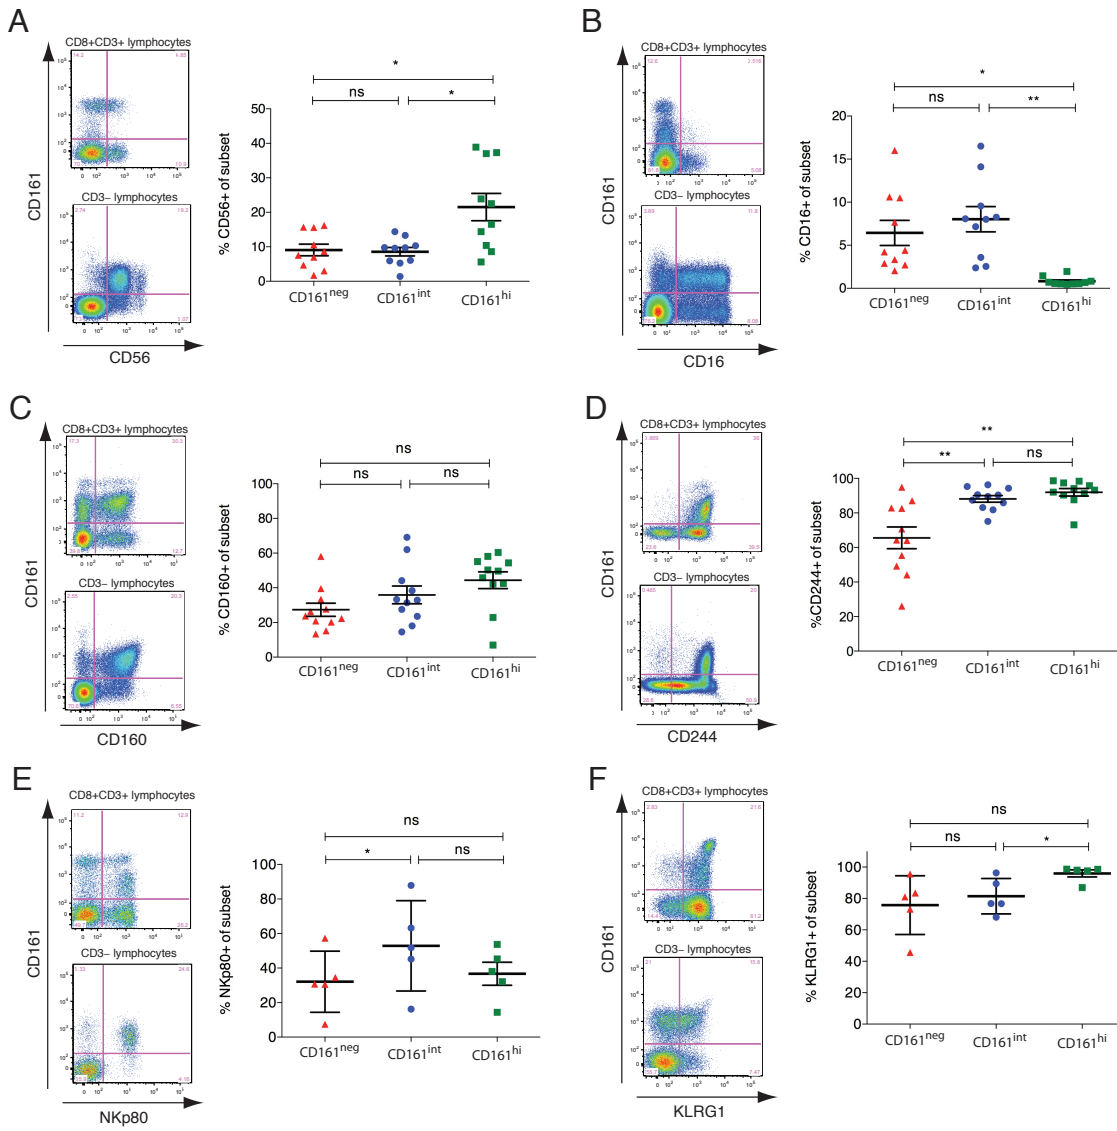

Figure S1

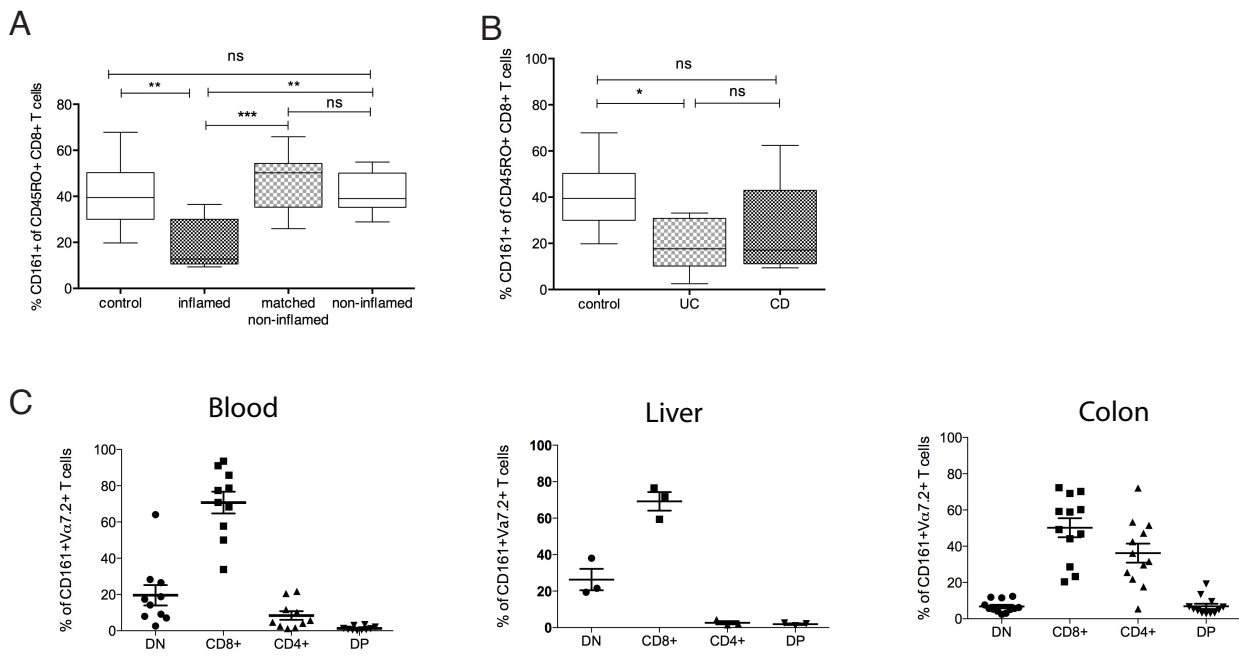

Figure S2

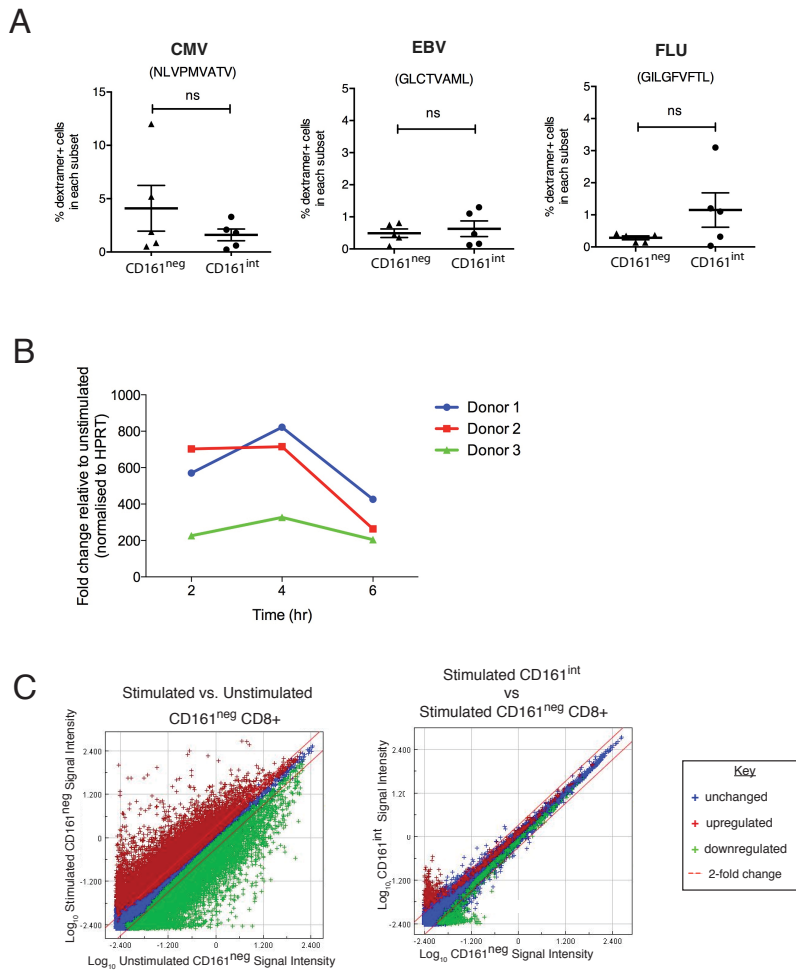

Figure S3

| <b>Name</b> | <b>Log(Ratio)</b> | <b>Fold Change</b> | <b>P-value</b> |
|-------------|-------------------|--------------------|----------------|
| LOC154449   | 1.5674            | 36.93178           | 7.90E-04       |
| LOC10012939 | 1.5189            | 33.02915           | 0.0016         |
| KIF12       | 1.40917           | 25.65476           | 0.00102        |
| C4orf38     | 1.39545           | 24.85694           | 8.30E-04       |
| KLRB1       | 1.38407           | 24.21392           | 1.27E-35       |
| PRSS41      | 1.31658           | 20.72901           | 1.90E-04       |
| ZNF334      | 1.25254           | 17.88716           | 7.40E-04       |
| CKAP2L      | 1.15318           | 14.22915           | 0.00195        |
| SPTB        | 1.1363            | 13.68688           | 1.30E-04       |
| PANX2       | 1.1359            | 13.67427           | 0.0011         |
| CYLC1       | 1.10491           | 12.73236           | 0.00227        |
| LOC440173   | 1.09857           | 12.54791           | 0.00275        |
| SCGB1D1     | 1.07624           | 11.919             | 0.00433        |
| C8orf48     | 1.07569           | 11.90405           | 0.00263        |
| C14orf162   | 1.07023           | 11.75519           | 2.29E-08       |
| PROKR1      | 1.00939           | 10.21865           | 9.30E-04       |
| KIF6        | 1.00835           | 10.19418           | 0.00357        |
| C1orf185    | 1.00729           | 10.16932           | 0.00775        |
| BIRC8       | 1.00033           | 10.00753           | 0.00193        |
| CTTNBP2NL   | 0.98936           | 9.75799            | 0.00886        |
| PATE2       | 0.9871            | 9.70726            | 0.00586        |
| TMEM178     | 0.9804            | 9.55866            | 0.00283        |
| IL16        | 0.96773           | 9.28391            | 0.00169        |
| CKMT1A      | 0.96613           | 9.24976            | 0.00354        |
| GPR158      | 0.95515           | 9.01891            | 4.60E-04       |
| PTCHD3      | 0.93862           | 8.68205            | 6.69E-06       |
| LOC10012890 | 0.93801           | 8.66986            | 0.00943        |
| ATP13A4     | 0.93052           | 8.52158            | 0.00155        |
| ADAM32      | 0.92413           | 8.39702            | 0.00441        |
| LETM1       | 0.91559           | 8.23355            | 4.86E-09       |
| LOC653203   | 0.91285           | 8.18174            | 5.40E-04       |
| ZSCAN2      | 0.90342           | 8.00616            | 2.27E-10       |
| IGFBP5      | 0.89929           | 7.93028            | 0.00495        |
| C19orf30    | 0.89232           | 7.80409            | 3.04E-11       |
| TTC28       | 0.88297           | 7.63782            | 1.65E-07       |
| ZDHHC20     | 0.87152           | 7.43914            | 2.83E-07       |
| POM121L2    | 0.86811           | 7.38095            | 0.00233        |
| C21orf82    | 0.8656            | 7.33838            | 0.00491        |
| POLR2J2     | 0.86447           | 7.3193             | 2.97E-08       |
| FAM118A     | 0.84937           | 7.06926            | 9.53E-08       |
| PRSS35      | 0.84807           | 7.04801            | 2.60E-04       |
| LOC283335   | 0.84792           | 7.04567            | 1.09E-07       |
| LOC10012985 | 0.8463            | 7.01936            | 0.00299        |
| RAB3B       | 0.82609           | 6.70029            | 0.00348        |
| VNN3        | 0.822             | 6.63745            | 0.00388        |
| LOC284454   | 0.81642           | 6.55273            | 6.85E-08       |
| PARD3B      | 0.8155            | 6.53877            | 0.00724        |
| TBXA2R      | 0.80864           | 6.4364             | 2.99E-07       |



|             |         |         |          |
|-------------|---------|---------|----------|
| TBXA2R      | 0.80864 | 6.4364  | 2.99E-07 |
| GBP6        | 0.79739 | 6.27174 | 2.88E-08 |
| ACBD7       | 0.79553 | 6.24495 | 5.12E-09 |
| KIAA1875    | 0.78617 | 6.11187 | 1.87E-07 |
| KRT23       | 0.78313 | 6.06918 | 3.10E-04 |
| CUX2        | 0.77457 | 5.95079 | 0.0073   |
| DPY19L2P1   | 0.77174 | 5.9121  | 0.00937  |
| ZNF2        | 0.76997 | 5.88806 | 4.62E-08 |
| ZNF713      | 0.765   | 5.82107 | 2.54E-08 |
| ZNF713      | 0.765   | 5.82107 | 2.54E-08 |
| COX6B2      | 0.74906 | 5.61126 | 2.46E-07 |
| HYAL4       | 0.74218 | 5.52305 | 9.81E-08 |
| GS85        | 0.74076 | 5.50508 | 0.00715  |
| LOC401233   | 0.72701 | 5.33343 | 5.58E-06 |
| IL4I1       | 0.72043 | 5.25323 | 8.00E-05 |
| SLC4A10     | 0.71384 | 5.17412 | 0.00453  |
| PABPC1L2A   | 0.71114 | 5.14204 | 0.00572  |
| VPREB3      | 0.70418 | 5.06035 | 1.40E-04 |
| FAM177B     | 0.69892 | 4.99943 | 3.50E-11 |
| ADCY5       | 0.69791 | 4.98776 | 0.00812  |
| CYP2B6      | 0.68384 | 4.82881 | 2.05E-07 |
| IL18RAP     | 0.66782 | 4.65393 | 3.16E-12 |
| IL18RAP     | 0.66782 | 4.65393 | 3.16E-12 |
| LTK         | 0.66758 | 4.65134 | 4.81E-16 |
| PAK3        | 0.66149 | 4.58658 | 0.00656  |
| B3GALT2     | 0.6379  | 4.3441  | 6.10E-04 |
| PTPN13      | 0.62393 | 4.2066  | 6.00E-05 |
| RN28S1      | 0.61082 | 4.08151 | 6.91E-12 |
| RN28S1      | 0.61082 | 4.08151 | 6.91E-12 |
| NCRNA00165  | 0.60658 | 4.04187 | 0.00813  |
| C8orf83     | 0.6056  | 4.03277 | 0.00741  |
| APOL5       | 0.60506 | 4.02772 | 8.00E-05 |
| BLK         | 0.60473 | 4.02465 | 0.00553  |
| LOC10028731 | 0.59732 | 3.9566  | 2.12E-09 |
| APBA1       | 0.59603 | 3.94485 | 4.80E-04 |
| C7orf51     | 0.59514 | 3.93677 | 0.00109  |
| psiTPTE22   | 0.58892 | 3.88082 | 2.00E-05 |
| FAT3        | 0.58852 | 3.87726 | 8.17E-07 |
| TAT         | 0.58125 | 3.81287 | 6.39E-08 |
| LOC10013311 | 0.57468 | 3.75565 | 2.10E-04 |
| ZNF157      | 0.56904 | 3.70715 | 5.65E-07 |
| LOC143286   | 0.56603 | 3.68152 | 2.00E-05 |
| LOC10013071 | 0.56477 | 3.67087 | 9.52E-07 |
| LOC284379   | 0.56342 | 3.65948 | 1.10E-08 |
| LOC340515   | 0.5591  | 3.62324 | 1.42E-13 |
| ARHGAP40    | 0.55826 | 3.61628 | 1.64E-08 |
| PQLC2       | 0.54889 | 3.53907 | 1.18E-09 |
| LOC619207   | 0.54852 | 3.53604 | 1.00E-05 |
| FAM110B     | 0.53694 | 3.44305 | 3.75E-06 |

|             |         |         |          |
|-------------|---------|---------|----------|
| CCR1        | 0.53694 | 3.44304 | 2.50E-04 |
| AMN         | 0.53507 | 3.4282  | 1.41E-06 |
| LRP3        | 0.52924 | 3.38251 | 0.00944  |
| AIF1L       | 0.51954 | 3.30779 | 1.80E-04 |
| DYSF        | 0.51915 | 3.30481 | 5.00E-05 |
| SCRN1       | 0.51147 | 3.24693 | 7.59E-06 |
| TYROBP      | 0.50911 | 3.22934 | 1.18E-13 |
| RASL10B     | 0.50907 | 3.22902 | 1.00E-04 |
| LOC10013421 | 0.50775 | 3.21919 | 6.15E-06 |
| SLC8A1      | 0.50185 | 3.17577 | 0.00151  |
| PIH1D2      | 0.50023 | 3.16394 | 1.00E-05 |
| RBP4        | 0.4995  | 3.15865 | 1.00E-04 |
| C14orf167   | 0.49855 | 3.15172 | 2.67E-08 |
| LCE1D       | 0.49797 | 3.14756 | 1.19E-09 |
| LOC10028938 | 0.49785 | 3.14663 | 6.51E-07 |
| LOC10028938 | 0.49785 | 3.14663 | 6.51E-07 |
| FOXA3       | 0.49743 | 3.14364 | 5.98E-06 |
| IL18R1      | 0.49637 | 3.13596 | 5.06E-22 |
| IL18R1      | 0.49637 | 3.13596 | 5.06E-22 |
| IL18R1      | 0.49637 | 3.13596 | 5.06E-22 |
| LOC145757   | 0.49494 | 3.12565 | 8.59E-08 |
| LCN9        | 0.49364 | 3.1163  | 3.00E-05 |
| COLQ        | 0.49237 | 3.10718 | 4.43E-09 |
| GFRA3       | 0.48685 | 3.06793 | 3.31E-07 |
| KIAA0087    | 0.4862  | 3.06339 | 1.90E-04 |
| LGALS3      | 0.48534 | 3.05729 | 2.00E-05 |
| FAM115C     | 0.48489 | 3.05413 | 1.63E-09 |
| LOC645553   | 0.48175 | 3.03212 | 2.04E-07 |
| LOC10013466 | 0.4814  | 3.02973 | 7.48E-06 |
| ISLR2       | 0.48137 | 3.02949 | 7.90E-04 |
| LOC284263   | 0.481   | 3.02694 | 4.18E-07 |
| LOC728449   | 0.48067 | 3.02459 | 2.49E-06 |
| LOC10013221 | 0.47889 | 3.01225 | 1.36E-06 |
| LOC10013221 | 0.47889 | 3.01225 | 1.36E-06 |
| LOC10013221 | 0.47889 | 3.01225 | 1.36E-06 |
| C17orf54    | 0.4782  | 3.00743 | 1.70E-04 |
| LOC10012866 | 0.47476 | 2.98372 | 0.00324  |
| HRH3        | 0.47467 | 2.9831  | 7.48E-07 |
| NRG4        | 0.47231 | 2.96697 | 2.00E-05 |
| ADAMTS7     | 0.47212 | 2.96566 | 6.59E-09 |
| ZNF865      | 0.4705  | 2.95463 | 8.79E-15 |
| CAMK2A      | 0.46857 | 2.94152 | 0.00422  |
| SOX15       | 0.46658 | 2.92805 | 0.0011   |
| PVRL4       | 0.46594 | 2.92375 | 2.80E-04 |
| LOC146795   | 0.46292 | 2.90349 | 2.91E-10 |
| CXCR6       | 0.46258 | 2.90122 | 1.80E-18 |
| SNAR-G1     | 0.46179 | 2.89595 | 0.00303  |
| MAF         | 0.46054 | 2.88763 | 6.94E-09 |
| CELF3       | 0.45917 | 2.87854 | 1.00E-05 |

|             |         |         |          |
|-------------|---------|---------|----------|
| LOC10012834 | 0.45754 | 2.86772 | 4.99E-07 |
| LOC10012834 | 0.45754 | 2.86772 | 4.99E-07 |
| TLE1        | 0.45746 | 2.86719 | 1.08E-09 |
| NR4A3       | 0.45595 | 2.85729 | 0.00156  |
| NYX         | 0.45559 | 2.8549  | 2.75E-10 |
| LOC10013155 | 0.45437 | 2.84689 | 1.51E-06 |
| GPR162      | 0.45246 | 2.83437 | 4.50E-04 |
| LOC10013169 | 0.45227 | 2.83316 | 3.78E-08 |
| RREP3       | 0.45142 | 2.82762 | 2.10E-04 |
| LOC145216   | 0.4488  | 2.81062 | 1.63E-07 |
| HHATL       | 0.44685 | 2.79801 | 0.00266  |
| PSD4        | 0.44674 | 2.79728 | 2.48E-06 |
| PCDHGA7     | 0.44581 | 2.79133 | 8.64E-06 |
| ADAM11      | 0.44522 | 2.78751 | 0.00177  |
| C3orf39     | 0.44474 | 2.78447 | 2.28E-07 |
| LDHAL6A     | 0.44116 | 2.7616  | 4.30E-09 |
| AS3MT       | 0.43977 | 2.75274 | 7.26E-15 |
| IQSEC3      | 0.43958 | 2.75157 | 2.33E-07 |
| PPP1R14A    | 0.43953 | 2.75122 | 2.87E-07 |
| SMR3A       | 0.43851 | 2.74478 | 4.20E-04 |
| OR2H1       | 0.43639 | 2.73145 | 3.33E-08 |
| HRH1        | 0.43616 | 2.73    | 1.16E-06 |
| PAPL        | 0.43461 | 2.72027 | 3.72E-16 |
| TMIGD2      | 0.43457 | 2.71999 | 1.90E-04 |
| LOC10012984 | 0.43435 | 2.71861 | 1.00E-05 |
| LOC10013316 | 0.43154 | 2.7011  | 2.02E-10 |
| KLHL35      | 0.43095 | 2.69742 | 6.00E-05 |
| SLC18A3     | 0.4297  | 2.68967 | 5.99E-10 |
| LMX1B       | 0.4294  | 2.68781 | 8.00E-05 |
| CEACAM18    | 0.42878 | 2.68396 | 4.00E-04 |
| SPRNP1      | 0.426   | 2.66686 | 4.53E-08 |
| C17orf91    | 0.42568 | 2.66488 | 6.96E-08 |
| DTNA        | 0.42496 | 2.66046 | 5.27E-06 |
| MMP15       | 0.42341 | 2.65101 | 8.60E-12 |
| ZDHHC8      | 0.42332 | 2.65047 | 2.40E-04 |
| HCRT        | 0.42327 | 2.65014 | 0.00407  |
| GPR155      | 0.42311 | 2.64916 | 6.22E-13 |
| NUDT8       | 0.4226  | 2.64605 | 3.65E-07 |
| PTAFR       | 0.42253 | 2.64564 | 1.92E-06 |
| FBRSL1      | 0.42226 | 2.644   | 1.46E-06 |
| ADAM12      | 0.4221  | 2.64304 | 4.00E-05 |
| SLC9A4      | 0.42077 | 2.63494 | 1.80E-11 |
| SLC9A4      | 0.42077 | 2.63494 | 1.80E-11 |
| LOC654779   | 0.41996 | 2.63001 | 1.40E-04 |
| IQSEC2      | 0.41729 | 2.61392 | 7.70E-07 |
| FAM21C      | 0.41487 | 2.5994  | 4.81E-06 |
| LOC389033   | 0.41406 | 2.59456 | 1.64E-09 |
| KCNH3       | 0.41401 | 2.59426 | 1.10E-06 |
| ABCC6       | 0.41285 | 2.58731 | 1.00E-04 |

|             |         |         |          |
|-------------|---------|---------|----------|
| TFEB        | 0.41277 | 2.58686 | 2.32E-13 |
| LOC400558   | 0.41255 | 2.58554 | 1.00E-05 |
| WFDC3       | 0.41221 | 2.58349 | 1.74E-06 |
| LY6G6D      | 0.41218 | 2.58331 | 4.00E-05 |
| SSX3        | 0.41167 | 2.58032 | 2.70E-09 |
| ADAM33      | 0.41112 | 2.57752 | 1.63E-12 |
| ALDH1L2     | 0.41086 | 2.57548 | 0.00908  |
| COL5A1      | 0.41072 | 2.57466 | 4.00E-04 |
| ZBTB16      | 0.41006 | 2.57076 | 8.73E-08 |
| CHST13      | 0.40964 | 2.56826 | 3.96E-12 |
| HOXA10      | 0.40959 | 2.56799 | 7.18E-07 |
| DOCK3       | 0.40937 | 2.56665 | 0.00253  |
| KIT         | 0.40921 | 2.56575 | 0.00272  |
| HRASLS5     | 0.40686 | 2.5519  | 5.99E-17 |
| ATP6V0A4    | 0.40609 | 2.54735 | 0.00106  |
| MOCS3       | 0.40552 | 2.54402 | 4.00E-05 |
| HMX2        | 0.40545 | 2.54363 | 3.00E-05 |
| LOC10012914 | 0.40517 | 2.54197 | 6.67E-09 |
| PHOSPHO1    | 0.4041  | 2.53571 | 1.50E-06 |
| HMG20B      | 0.40404 | 2.53539 | 5.70E-07 |
| TPSG1       | 0.40329 | 2.531   | 3.39E-12 |
| HSCB        | 0.40311 | 2.52992 | 5.01E-13 |
| DNAH10      | 0.40306 | 2.52966 | 0.00142  |
| FAM74A4     | 0.40252 | 2.52653 | 9.26E-15 |
| PALM        | 0.40198 | 2.52339 | 7.00E-05 |
| GPSM1       | 0.40159 | 2.52111 | 8.78E-09 |
| CLCA1       | 0.40152 | 2.52067 | 2.90E-04 |
| BCORP1      | 0.40074 | 2.51614 | 3.20E-04 |
| RRP7B       | 0.4004  | 2.51421 | 4.00E-13 |
| MPDZ        | 0.39949 | 2.50894 | 0.00907  |
| LOC10013236 | 0.39842 | 2.50276 | 7.99E-09 |
| PRB1        | 0.39814 | 2.50115 | 3.41E-07 |
| LOC399744   | 0.39782 | 2.49933 | 9.13E-06 |
| LIN28A      | 0.39728 | 2.4962  | 2.35E-07 |
| SALL3       | 0.39717 | 2.49557 | 9.20E-07 |
| LOC10012831 | 0.39713 | 2.49534 | 3.00E-05 |
| CNTN4       | 0.39706 | 2.49496 | 8.40E-04 |
| TFE3        | 0.39666 | 2.49263 | 3.93E-10 |
| MEG3        | 0.39614 | 2.48968 | 2.00E-05 |
| LRRC26      | 0.39488 | 2.48245 | 1.30E-07 |
| CDCP2       | 0.39479 | 2.48194 | 3.20E-04 |
| NMU         | 0.39466 | 2.48121 | 0.00943  |
| C8orf58     | 0.39401 | 2.47745 | 1.13E-06 |
| RNU105B     | 0.39387 | 2.47668 | 0.0032   |
| DDX58       | 0.39375 | 2.47602 | 4.00E-05 |
| FEZ1        | 0.39289 | 2.47109 | 0.00237  |
| LOC10050774 | 0.39147 | 2.46306 | 1.54E-09 |
| LOC10012959 | 0.39088 | 2.4597  | 7.26E-07 |
| PRLHR       | 0.39058 | 2.45799 | 2.20E-07 |

|             |         |         |          |
|-------------|---------|---------|----------|
| LOC440518   | 0.3899  | 2.45414 | 1.30E-04 |
| KRT7        | 0.38948 | 2.4518  | 2.67E-08 |
| LOC10012833 | 0.38944 | 2.45154 | 1.11E-06 |
| NEUROG3     | 0.38851 | 2.4463  | 3.20E-08 |
| F7          | 0.38803 | 2.44361 | 2.00E-05 |
| CDX1        | 0.38759 | 2.44112 | 1.92E-10 |
| LOC10013028 | 0.38736 | 2.43981 | 4.30E-06 |
| LOC10051001 | 0.38704 | 2.43802 | 1.16E-11 |
| TPP1        | 0.38656 | 2.43535 | 3.46E-06 |
| PLCB1       | 0.38542 | 2.42893 | 0.00232  |
| PLCB1       | 0.38542 | 2.42893 | 0.00232  |
| GPR25       | 0.38404 | 2.42127 | 7.34E-07 |
| LOC10012810 | 0.38367 | 2.41919 | 1.13E-09 |
| WNK4        | 0.38343 | 2.41784 | 3.27E-07 |
| LOC10051065 | 0.38322 | 2.41668 | 0.00153  |
| FAM99A      | 0.38223 | 2.41119 | 2.00E-06 |
| MAP4        | 0.38215 | 2.41072 | 7.64E-13 |
| LONRF3      | 0.38193 | 2.40953 | 1.69E-07 |
| TERC        | 0.38174 | 2.40847 | 9.67E-09 |
| LOC10027068 | 0.38072 | 2.40284 | 5.00E-05 |
| KCNK15      | 0.38056 | 2.40192 | 7.67E-09 |
| COL27A1     | 0.38029 | 2.40042 | 2.31E-07 |
| HOXA9       | 0.37983 | 2.39788 | 5.58E-06 |
| CTRB2       | 0.37814 | 2.3886  | 9.58E-06 |
| ACTRT2      | 0.37774 | 2.38641 | 0.00404  |
| ANKRD33     | 0.37724 | 2.38363 | 8.62E-09 |
| LOC10012972 | 0.37706 | 2.38264 | 3.39E-08 |
| BCL2L11     | 0.37651 | 2.37961 | 2.67E-06 |
| CD4         | 0.37503 | 2.37155 | 3.92E-10 |
| PRKAG3      | 0.37424 | 2.36723 | 4.43E-11 |
| LOC10012897 | 0.37356 | 2.3635  | 8.10E-04 |
| CTXN1       | 0.37338 | 2.36252 | 6.94E-08 |
| FLJ23867    | 0.3731  | 2.36101 | 4.70E-04 |
| APBB2       | 0.37235 | 2.35697 | 2.70E-08 |
| C8orf56     | 0.37233 | 2.35685 | 2.23E-07 |
| LOC10012911 | 0.37072 | 2.3481  | 6.90E-07 |
| LFNG        | 0.37051 | 2.34698 | 2.76E-09 |
| HBZ         | 0.37037 | 2.34624 | 1.80E-12 |
| TNP2        | 0.37035 | 2.34613 | 6.71E-10 |
| KRTAP10-10  | 0.37012 | 2.34486 | 6.74E-07 |
| ACAD10      | 0.36986 | 2.34348 | 1.93E-09 |
| C14orf181   | 0.36976 | 2.34295 | 2.00E-05 |
| PRRC2B      | 0.3687  | 2.33725 | 2.00E-05 |
| LOC10013091 | 0.36809 | 2.33396 | 0.00629  |
| IER5L       | 0.36752 | 2.3309  | 3.00E-05 |
| UTF1        | 0.36706 | 2.32839 | 1.57E-09 |
| ALPPL2      | 0.36662 | 2.32608 | 6.83E-09 |
| B3GNT7      | 0.36641 | 2.32494 | 1.52E-08 |
| ACCN4       | 0.36624 | 2.32402 | 1.13E-06 |

|             |         |         |          |
|-------------|---------|---------|----------|
| EMILIN3     | 0.36603 | 2.32291 | 4.00E-05 |
| CCR2        | 0.3655  | 2.32005 | 2.00E-05 |
| CCR2        | 0.3655  | 2.32005 | 2.00E-05 |
| ZC3HAV1L    | 0.36485 | 2.31662 | 7.97E-07 |
| LOC10013296 | 0.36458 | 2.31515 | 1.11E-06 |
| LOC10013296 | 0.36458 | 2.31515 | 1.11E-06 |
| ARAF2P      | 0.36413 | 2.31278 | 7.03E-09 |
| RPH3A       | 0.36401 | 2.31211 | 4.00E-05 |
| LOC388152   | 0.36341 | 2.30891 | 1.14E-09 |
| KRTAP1-3    | 0.36319 | 2.30778 | 0.00102  |
| HSP90AA5P   | 0.36132 | 2.29787 | 4.00E-05 |
| SLC6A10P    | 0.36131 | 2.2978  | 3.89E-07 |
| LOC10012911 | 0.36041 | 2.29304 | 0.00669  |
| CLDN19      | 0.35876 | 2.28432 | 6.39E-06 |
| ACAP3       | 0.35817 | 2.28126 | 5.48E-07 |
| EXOC3L      | 0.35783 | 2.27948 | 9.10E-04 |
| CHRD        | 0.35757 | 2.2781  | 4.50E-04 |
| LOC10013021 | 0.35718 | 2.27605 | 1.74E-06 |
| DIABLO      | 0.35713 | 2.2758  | 4.10E-07 |
| OR5H1       | 0.35709 | 2.27555 | 7.66E-06 |
| VPS53       | 0.35684 | 2.27426 | 7.50E-04 |
| NRG1        | 0.35673 | 2.2737  | 0.00234  |
| LOC10013015 | 0.35669 | 2.27347 | 1.69E-08 |
| USP17       | 0.35622 | 2.271   | 0.00143  |
| GALE        | 0.35577 | 2.26869 | 5.00E-05 |
| KRT78       | 0.35552 | 2.26737 | 0.00228  |
| OR5L2       | 0.35551 | 2.26733 | 9.52E-06 |
| C20orf141   | 0.35537 | 2.26656 | 7.77E-06 |
| MGC4859     | 0.35527 | 2.26605 | 3.00E-11 |
| PCDHB13     | 0.35513 | 2.26532 | 3.60E-04 |
| LOC644277   | 0.35448 | 2.26193 | 1.46E-08 |
| DEGS2       | 0.35331 | 2.25585 | 4.34E-08 |
| OR10H2      | 0.35326 | 2.25557 | 1.30E-04 |
| SPOCK2      | 0.35199 | 2.24899 | 1.29E-12 |
| PDE9A       | 0.35174 | 2.24771 | 8.36E-09 |
| ABCB1       | 0.3516  | 2.247   | 0.00741  |
| DPT         | 0.35137 | 2.2458  | 5.19E-07 |
| LOC10012791 | 0.35122 | 2.245   | 3.96E-08 |
| PRB3        | 0.35084 | 2.24306 | 2.00E-05 |
| HR          | 0.35063 | 2.24196 | 5.00E-05 |
| SPSB4       | 0.35046 | 2.24111 | 1.29E-08 |
| CDH22       | 0.35015 | 2.23949 | 1.65E-10 |
| C9orf173    | 0.34976 | 2.23746 | 7.49E-06 |
| C9orf173    | 0.34976 | 2.23746 | 7.49E-06 |
| NCRNA00106  | 0.34912 | 2.23417 | 1.60E-07 |
| WDR90       | 0.34834 | 2.23017 | 6.00E-05 |
| LOC10051006 | 0.34778 | 2.22731 | 7.82E-08 |
| LAMA4       | 0.34745 | 2.2256  | 9.40E-04 |
| MEFV        | 0.34656 | 2.22104 | 4.00E-05 |

|             |         |         |          |
|-------------|---------|---------|----------|
| DPYSL4      | 0.34638 | 2.22015 | 4.95E-13 |
| PRRT4       | 0.3463  | 2.21974 | 0.0078   |
| ZSCAN12P1   | 0.3462  | 2.21923 | 3.00E-05 |
| NCRNA00092  | 0.34617 | 2.21905 | 6.50E-04 |
| LOC283868   | 0.34596 | 2.21799 | 3.85E-07 |
| SPRR2D      | 0.34575 | 2.21691 | 2.58E-09 |
| RARA        | 0.34558 | 2.21606 | 1.42E-11 |
| CDRT3       | 0.34545 | 2.21541 | 4.00E-05 |
| C18orf12    | 0.34537 | 2.21497 | 6.71E-08 |
| SLCO2B1     | 0.34529 | 2.21455 | 0.00587  |
| C3orf43     | 0.34524 | 2.21433 | 0.00188  |
| CDK13       | 0.34522 | 2.21423 | 1.18E-09 |
| MAVS        | 0.345   | 2.21309 | 6.40E-04 |
| LOC283547   | 0.34498 | 2.21299 | 3.17E-10 |
| TBKBP1      | 0.34496 | 2.2129  | 1.30E-10 |
| TYMP        | 0.34493 | 2.21274 | 1.25E-11 |
| MYH14       | 0.34488 | 2.21247 | 1.74E-07 |
| FAM178B     | 0.34476 | 2.21188 | 7.00E-05 |
| PANX3       | 0.34456 | 2.21084 | 0.00907  |
| IL28A       | 0.34423 | 2.20919 | 5.71E-07 |
| KRTAP9-1    | 0.34403 | 2.20816 | 3.06E-08 |
| PRAP1       | 0.34382 | 2.20707 | 7.79E-08 |
| FDX1L       | 0.34365 | 2.20623 | 4.03E-07 |
| LOC402036   | 0.34338 | 2.20484 | 1.00E-05 |
| TSPAN11     | 0.34336 | 2.20476 | 2.74E-06 |
| LOC10013147 | 0.34306 | 2.20321 | 3.71E-06 |
| LOC284749   | 0.34189 | 2.19733 | 4.00E-05 |
| ACER2       | 0.34189 | 2.19731 | 0.00178  |
| OR1J4       | 0.34188 | 2.19725 | 0.00921  |
| GHSR        | 0.34178 | 2.19676 | 5.68E-16 |
| KRTAP10-8   | 0.34158 | 2.19573 | 1.00E-05 |
| C1orf158    | 0.34154 | 2.19554 | 1.22E-06 |
| KRTAP9L1    | 0.3415  | 2.19533 | 0.00338  |
| LOC728675   | 0.34145 | 2.1951  | 0.00433  |
| NCRNA00253  | 0.34099 | 2.19274 | 8.82E-06 |
| NEDD4       | 0.3408  | 2.1918  | 0.00231  |
| POLR2F      | 0.33948 | 2.18515 | 5.91E-10 |
| KIRREL2     | 0.33858 | 2.18063 | 2.00E-05 |
| SPINK7      | 0.33849 | 2.18018 | 4.71E-09 |
| SAMD11      | 0.33849 | 2.18015 | 1.00E-04 |
| HES6        | 0.33833 | 2.17936 | 2.65E-11 |
| EPS8L3      | 0.33801 | 2.17774 | 1.40E-04 |
| PRO0471     | 0.33797 | 2.17757 | 0.00658  |
| LOC10013045 | 0.3376  | 2.17571 | 2.70E-09 |
| C15orf62    | 0.3375  | 2.17521 | 2.12E-07 |
| RTN3        | 0.33725 | 2.17394 | 3.26E-08 |
| CHST6       | 0.33598 | 2.16758 | 8.70E-07 |
| LOC400968   | 0.33588 | 2.16711 | 1.00E-05 |
| SLC11A1     | 0.33581 | 2.16676 | 3.25E-09 |

|             |         |         |          |
|-------------|---------|---------|----------|
| LOC389273   | 0.33546 | 2.165   | 4.90E-04 |
| LOC285095   | 0.33544 | 2.16493 | 0.00406  |
| PHF21B      | 0.33463 | 2.16088 | 1.00E-04 |
| FLJ44385    | 0.33405 | 2.15798 | 5.30E-04 |
| CCDC78      | 0.33402 | 2.15784 | 1.05E-06 |
| UPK3B       | 0.33352 | 2.15536 | 0.00698  |
| ZSCAN30     | 0.33349 | 2.15519 | 2.70E-04 |
| LOC10050659 | 0.33334 | 2.15479 | 7.00E-05 |
| RPL23AP32   | 0.33297 | 2.15263 | 5.00E-05 |
| NOTCH1      | 0.33286 | 2.15207 | 0.00105  |
| NOTCH1      | 0.33286 | 2.15207 | 0.00105  |
| LOC10051000 | 0.33284 | 2.15199 | 2.21E-10 |
| LOC10013041 | 0.33251 | 2.15037 | 9.10E-04 |
| TOR2A       | 0.3315  | 2.14537 | 6.02E-07 |
| STARD8      | 0.33107 | 2.14323 | 0.00316  |
| DSE         | 0.33106 | 2.14317 | 0.00772  |
| LACTBL1     | 0.33101 | 2.14293 | 4.00E-05 |
| NOBOX       | 0.32913 | 2.13368 | 2.89E-08 |
| CORT        | 0.329   | 2.13304 | 5.10E-04 |
| FAM120C     | 0.32883 | 2.13219 | 3.28E-08 |
| LOC10028958 | 0.32867 | 2.13144 | 2.90E-04 |
| CDC14C      | 0.32856 | 2.1309  | 4.18E-06 |
| LOC10050726 | 0.32851 | 2.13064 | 1.36E-06 |
| SPHK1       | 0.32825 | 2.12934 | 1.00E-05 |
| EMX1        | 0.3277  | 2.12669 | 1.30E-07 |
| CBX7        | 0.32758 | 2.1261  | 1.48E-06 |
| C21orf58    | 0.32638 | 2.12022 | 1.40E-04 |
| IL17RE      | 0.3263  | 2.11983 | 8.37E-08 |
| FLJ40606    | 0.32611 | 2.11891 | 2.78E-09 |
| ARHGAP33    | 0.32608 | 2.11877 | 1.00E-04 |
| SOX13       | 0.32501 | 2.11352 | 1.75E-10 |
| TREM1       | 0.32445 | 2.11084 | 5.50E-04 |
| COL11A2     | 0.3242  | 2.10959 | 6.27E-06 |
| ASB10       | 0.32382 | 2.10776 | 1.00E-05 |
| KRT73       | 0.3231  | 2.10426 | 2.94E-07 |
| ATXN2L      | 0.32257 | 2.10167 | 1.40E-07 |
| TNXB        | 0.32253 | 2.10152 | 1.46E-06 |
| OR11A1      | 0.32226 | 2.1002  | 4.00E-05 |
| KCP         | 0.32116 | 2.09489 | 3.26E-07 |
| RAPH1       | 0.32046 | 2.0915  | 3.30E-04 |
| HAR1A       | 0.32014 | 2.08998 | 4.00E-05 |
| KCND3       | 0.31992 | 2.08893 | 2.24E-10 |
| RTBDN       | 0.31988 | 2.08872 | 7.30E-04 |
| EPHB2       | 0.31891 | 2.08408 | 0.00331  |
| ADM2        | 0.31871 | 2.08311 | 6.30E-04 |
| LOC151009   | 0.31871 | 2.08309 | 3.93E-06 |
| CCL24       | 0.31831 | 2.08118 | 4.75E-07 |
| MOS         | 0.31823 | 2.08081 | 3.00E-05 |
| TH          | 0.31818 | 2.08055 | 1.00E-05 |



|             |         |         |          |
|-------------|---------|---------|----------|
| C19orf69    | 0.31801 | 2.07974 | 2.62E-08 |
| LHCGR       | 0.31789 | 2.07917 | 0.00592  |
| GPR152      | 0.31669 | 2.07343 | 8.29E-07 |
| DLK1        | 0.31648 | 2.07245 | 2.10E-04 |
| C14orf70    | 0.31644 | 2.07224 | 2.28E-08 |
| SHISA4      | 0.31641 | 2.07209 | 3.30E-06 |
| LOC146429   | 0.31553 | 2.06788 | 0.00696  |
| SEMA3B      | 0.31546 | 2.06757 | 6.00E-05 |
| LOC10021654 | 0.31538 | 2.0672  | 7.00E-05 |
| KRTAP9L2    | 0.31517 | 2.06617 | 1.06E-08 |
| KLHL33      | 0.31516 | 2.06614 | 1.90E-06 |
| LOC149950   | 0.3151  | 2.06586 | 3.55E-09 |
| BTNL8       | 0.31461 | 2.0635  | 3.90E-04 |
| WWOX        | 0.31428 | 2.06197 | 0.00359  |
| EFCAB10     | 0.31383 | 2.05982 | 1.30E-04 |
| SLC17A7     | 0.31375 | 2.05944 | 4.26E-08 |
| SLC16A12    | 0.31352 | 2.05835 | 6.57E-13 |
| KIF17       | 0.31348 | 2.05818 | 0.00418  |
| LOC648044   | 0.31299 | 2.05586 | 0.00604  |
| FIGNL2      | 0.31282 | 2.05503 | 2.20E-04 |
| DERL3       | 0.31279 | 2.0549  | 3.24E-08 |
| LOC10013398 | 0.31217 | 2.05199 | 4.60E-09 |
| TLL4        | 0.3121  | 2.05165 | 1.30E-06 |
| AXL         | 0.31183 | 2.05038 | 3.00E-04 |
| PLEKHG5     | 0.31168 | 2.04964 | 3.35E-09 |
| FMO6P       | 0.31164 | 2.04945 | 0.00123  |
| SLC6A6      | 0.31146 | 2.04862 | 7.00E-05 |
| FGF5        | 0.31123 | 2.04753 | 0.00206  |
| LOC10012997 | 0.31101 | 2.04648 | 0.00175  |
| CABP5       | 0.31059 | 2.04452 | 1.33E-08 |
| FLJ39632    | 0.3102  | 2.04269 | 4.62E-08 |
| CCL16       | 0.31007 | 2.04207 | 4.08E-07 |
| CD79A       | 0.30971 | 2.04039 | 2.00E-04 |
| LOC10013279 | 0.30949 | 2.03935 | 3.09E-12 |
| C8orf67     | 0.30894 | 2.03674 | 4.90E-04 |
| LOC10012919 | 0.30886 | 2.03638 | 3.40E-04 |
| ESRRG       | 0.30884 | 2.03627 | 7.70E-04 |
| C16orf5     | 0.30871 | 2.03568 | 2.00E-05 |
| PALM3       | 0.3087  | 2.03563 | 9.00E-05 |
| TMEM146     | 0.30843 | 2.03439 | 3.61E-08 |
| FAM71E2     | 0.30828 | 2.03368 | 3.55E-06 |
| ATF3        | 0.30828 | 2.03366 | 1.90E-04 |
| ATF3        | 0.30828 | 2.03366 | 1.90E-04 |
| LOC652119   | 0.30798 | 2.03228 | 2.41E-09 |
| MEF2D       | 0.3078  | 2.03144 | 3.43E-06 |
| WNT3A       | 0.30746 | 2.02984 | 2.89E-06 |
| C9orf71     | 0.30697 | 2.02756 | 0.00111  |
| GNAO1       | 0.306   | 2.02303 | 8.00E-05 |
| LOC731932   | 0.30527 | 2.01962 | 7.46E-09 |

|             |          |          |          |
|-------------|----------|----------|----------|
| HGFAC       | 0.30521  | 2.01935  | 1.34E-07 |
| LOC10050718 | 0.30507  | 2.0187   | 5.75E-06 |
| KRT85       | 0.30487  | 2.01777  | 2.00E-05 |
| SCUBE1      | 0.30485  | 2.01768  | 0.001    |
| LRRN2       | 0.30462  | 2.0166   | 7.65E-07 |
| LST1        | 0.30461  | 2.01653  | 0.00206  |
| MEX3D       | 0.30443  | 2.01573  | 1.51E-15 |
| IL17REL     | 0.30434  | 2.01529  | 2.16E-07 |
| KRT81       | 0.30402  | 2.01382  | 5.37E-11 |
| TMEM201     | 0.30343  | 2.01109  | 4.77E-08 |
| PHF16       | 0.30326  | 2.0103   | 5.40E-04 |
| LOC440313   | 0.30318  | 2.00991  | 0.00171  |
| LOC10012838 | 0.30312  | 2.00964  | 0.00838  |
| MT3         | 0.30288  | 2.00852  | 1.03E-06 |
| TAS1R3      | 0.30268  | 2.00761  | 6.00E-05 |
| SLC5A6      | 0.30238  | 2.00623  | 3.72E-11 |
| PITX3       | 0.30208  | 2.00484  | 5.22E-07 |
| NCRNA00260  | 0.30153  | 2.0023   | 5.70E-04 |
| CLN5        | -0.30305 | -2.00934 | 0.00508  |
| MPPE1       | -0.30364 | -2.01204 | 5.30E-04 |
| TSEN2       | -0.3037  | -2.01231 | 7.70E-04 |
| SUPT3H      | -0.30372 | -2.01243 | 0.00512  |
| IKBKE       | -0.30445 | -2.01582 | 0.00368  |
| PPARGC1B    | -0.30538 | -2.02013 | 0.00897  |
| LOC649294   | -0.30602 | -2.0231  | 0.00252  |
| FAM117B     | -0.30721 | -2.02868 | 1.03E-07 |
| CTSZ        | -0.30747 | -2.02986 | 0.00952  |
| CTSZ        | -0.30747 | -2.02986 | 0.00952  |
| PRIM2       | -0.30802 | -2.03245 | 0.00564  |
| CTPS2       | -0.30808 | -2.03273 | 8.70E-04 |
| LOC338620   | -0.31101 | -2.04647 | 0.0027   |
| TP53        | -0.31139 | -2.04827 | 1.20E-04 |
| TMEM185A    | -0.31216 | -2.05192 | 6.20E-04 |
| RDX         | -0.3122  | -2.0521  | 0.00759  |
| IFNAR2      | -0.31456 | -2.0633  | 0.00346  |
| CRIP2       | -0.31687 | -2.07427 | 0.00604  |
| EPHX2       | -0.31714 | -2.07558 | 0.00145  |
| EGLN3       | -0.31722 | -2.07598 | 0.00159  |
| FANCI       | -0.31725 | -2.07609 | 0.00362  |
| LOC727916   | -0.31754 | -2.07751 | 0.00884  |
| EGFEM1P     | -0.31792 | -2.07934 | 0.00622  |
| LOC257396   | -0.31843 | -2.08173 | 0.0017   |
| MCM7        | -0.31944 | -2.0866  | 1.00E-05 |
| INF2        | -0.31947 | -2.08675 | 7.00E-05 |
| ST8SIA1     | -0.31948 | -2.08681 | 0.00147  |
| RTN2        | -0.31975 | -2.08808 | 0.00414  |
| MAP3K1      | -0.31999 | -2.08924 | 4.94E-07 |
| TMPO        | -0.32007 | -2.08965 | 0.00106  |
| IL4         | -0.32036 | -2.09102 | 0.00727  |

|             |          |          |          |
|-------------|----------|----------|----------|
| SLC7A1      | -0.32115 | -2.09485 | 5.30E-04 |
| FCGBP       | -0.32211 | -2.09947 | 8.00E-05 |
| TGFB3       | -0.32347 | -2.10605 | 6.50E-04 |
| PRKCA       | -0.32378 | -2.10755 | 7.60E-04 |
| HSD17B3     | -0.32381 | -2.1077  | 0.00461  |
| CCDC134     | -0.3244  | -2.11059 | 0.00549  |
| RABIF       | -0.32456 | -2.11137 | 0.00385  |
| TTLL13      | -0.3249  | -2.113   | 0.00266  |
| LEKR1       | -0.32551 | -2.11598 | 0.00358  |
| SC4MOL      | -0.32703 | -2.1234  | 3.10E-04 |
| GIN54       | -0.32737 | -2.12504 | 2.90E-04 |
| MRC2        | -0.32949 | -2.13544 | 0.00264  |
| LYL1        | -0.32949 | -2.13548 | 0.00158  |
| SUN3        | -0.33059 | -2.14088 | 0.0031   |
| CRTC3       | -0.33122 | -2.14397 | 7.00E-05 |
| WDHD1       | -0.33147 | -2.14523 | 0.00194  |
| SLC23A3     | -0.33171 | -2.14637 | 9.40E-04 |
| SLC1A5      | -0.33171 | -2.14641 | 0.00583  |
| CLEC3B      | -0.33273 | -2.15144 | 0.00689  |
| INCENP      | -0.3329  | -2.15228 | 0.00331  |
| LOC10050938 | -0.33431 | -2.15927 | 0.00963  |
| ELL3        | -0.33492 | -2.1623  | 0.00367  |
| CCNG2       | -0.33599 | -2.16765 | 0.00109  |
| FOXK1       | -0.33751 | -2.17524 | 0.00737  |
| IL6ST       | -0.33752 | -2.1753  | 1.02E-14 |
| IL6ST       | -0.33752 | -2.1753  | 1.02E-14 |
| IL6ST       | -0.33752 | -2.1753  | 1.02E-14 |
| WNT10A      | -0.33773 | -2.17635 | 0.00202  |
| PLTP        | -0.34062 | -2.1909  | 0.00492  |
| ZNF823      | -0.3413  | -2.19431 | 0.00909  |
| AMT         | -0.34147 | -2.19516 | 0.00281  |
| HNRPLL      | -0.34187 | -2.19722 | 0.00947  |
| LHFPL5      | -0.34277 | -2.20175 | 4.60E-04 |
| CES4A       | -0.34292 | -2.20252 | 0.0015   |
| LOC401037   | -0.34569 | -2.21662 | 0.0066   |
| ADCK1       | -0.34714 | -2.22401 | 0.00297  |
| GAB2        | -0.34774 | -2.22712 | 0.00412  |
| MAL         | -0.34832 | -2.23009 | 2.80E-04 |
| HS1BP3      | -0.34871 | -2.23206 | 0.00813  |
| HERC2       | -0.34879 | -2.23247 | 0.00195  |
| PKIA        | -0.34973 | -2.23731 | 7.00E-05 |
| C1S         | -0.34992 | -2.23829 | 9.10E-04 |
| FLJ36848    | -0.35018 | -2.23964 | 0.00148  |
| MCM4        | -0.35118 | -2.2448  | 0.0098   |
| MAGED2      | -0.3528  | -2.25319 | 0.00542  |
| GREB1L      | -0.35396 | -2.25924 | 0.00118  |
| CASS4       | -0.35429 | -2.26095 | 0.00171  |
| TMEM194A    | -0.35436 | -2.26133 | 0.00107  |
| LOC10013399 | -0.35439 | -2.26148 | 0.00671  |

|            |          |          |          |
|------------|----------|----------|----------|
| GHITM      | -0.35539 | -2.26669 | 0.00936  |
| C1R        | -0.35757 | -2.27807 | 0.00361  |
| FGD4       | -0.35849 | -2.28291 | 0.00631  |
| E2F2       | -0.36014 | -2.29158 | 5.00E-05 |
| ZNF433     | -0.36098 | -2.29604 | 0.00856  |
| OR2A1      | -0.36179 | -2.30031 | 0.00268  |
| C2orf89    | -0.3618  | -2.30036 | 0.00461  |
| SFXN1      | -0.36184 | -2.30058 | 0.00888  |
| TRIB1      | -0.36249 | -2.30405 | 5.70E-04 |
| NCRNA00162 | -0.36416 | -2.31294 | 0.00284  |
| ADORA2A    | -0.36488 | -2.31677 | 0.00979  |
| CCDC19     | -0.36507 | -2.31779 | 0.00996  |
| APP        | -0.36509 | -2.31788 | 0.00102  |
| KIF20B     | -0.36698 | -2.328   | 4.40E-04 |
| C1orf228   | -0.36796 | -2.33324 | 3.40E-04 |
| MURC       | -0.36813 | -2.33417 | 0.00881  |
| FBXO15     | -0.37009 | -2.34472 | 0.00224  |
| LOC643783  | -0.37226 | -2.35646 | 1.00E-04 |
| ZNF488     | -0.37358 | -2.36363 | 0.00577  |
| RGS16      | -0.37591 | -2.37636 | 6.60E-04 |
| ADAMTS6    | -0.37618 | -2.37784 | 0.00799  |
| SESN3      | -0.37687 | -2.38159 | 0.00476  |
| BCL7A      | -0.3772  | -2.38341 | 0.00921  |
| FCHSD1     | -0.37897 | -2.39317 | 0.00858  |
| BICD1      | -0.38202 | -2.40999 | 0.00551  |
| MLF1IP     | -0.38207 | -2.41029 | 0.00863  |
| USP21      | -0.3828  | -2.41435 | 0.00808  |
| MYEF2      | -0.38692 | -2.43734 | 9.20E-04 |
| RPL32P3    | -0.38759 | -2.44111 | 8.00E-05 |
| BTBD8      | -0.38831 | -2.44519 | 0.00368  |
| HCRP1      | -0.38925 | -2.45046 | 0.00307  |
| LASS6      | -0.39082 | -2.45933 | 7.00E-05 |
| LASS6      | -0.39082 | -2.45933 | 7.00E-05 |
| ZNF35      | -0.39175 | -2.46462 | 0.00194  |
| MEOX1      | -0.39301 | -2.47176 | 0.00195  |
| GYPE       | -0.39332 | -2.47354 | 0.00745  |
| KCNRG      | -0.39351 | -2.47461 | 0.00384  |
| RWDD4      | -0.39431 | -2.47918 | 6.20E-04 |
| L3MBTL1    | -0.39502 | -2.48323 | 6.10E-04 |
| L3MBTL1    | -0.39502 | -2.48323 | 6.10E-04 |
| OSMR       | -0.39556 | -2.48635 | 0.00735  |
| SGOL2      | -0.39563 | -2.48675 | 0.00371  |
| SLC25A26   | -0.3967  | -2.49286 | 0.00325  |
| AKTIP      | -0.39681 | -2.49348 | 1.00E-05 |
| CSGALNACT1 | -0.39955 | -2.5093  | 6.70E-04 |
| CSGALNACT1 | -0.39955 | -2.5093  | 6.70E-04 |
| SEMA5A     | -0.39981 | -2.51082 | 0.00763  |
| PPIEL      | -0.4003  | -2.51362 | 0.00894  |
| CPLX3      | -0.4012  | -2.51884 | 0.00594  |

|             |          |          |          |
|-------------|----------|----------|----------|
| NELL2       | -0.40157 | -2.52096 | 1.80E-04 |
| TOR3A       | -0.40213 | -2.52423 | 1.90E-04 |
| TNNC1       | -0.40224 | -2.52488 | 0.00182  |
| CENPE       | -0.40255 | -2.5267  | 0.0015   |
| ZFP14       | -0.40288 | -2.52857 | 9.70E-04 |
| SLC26A1     | -0.40327 | -2.53089 | 0.00313  |
| ZDHHC23     | -0.40469 | -2.53914 | 0.002    |
| HSF5        | -0.40549 | -2.54384 | 0.0081   |
| IQCA1       | -0.40583 | -2.54583 | 0.00704  |
| NUDT7       | -0.406   | -2.54683 | 0.00528  |
| LOC643837   | -0.40639 | -2.54913 | 0.00888  |
| SPATA24     | -0.40667 | -2.55077 | 0.00965  |
| UBTD2       | -0.40947 | -2.56726 | 0.00782  |
| LOC729680   | -0.4098  | -2.5692  | 0.00311  |
| SORD        | -0.41016 | -2.57136 | 0.00884  |
| C1orf162    | -0.41107 | -2.57674 | 1.27E-07 |
| ProSAPiP1   | -0.41109 | -2.57687 | 4.00E-05 |
| C6orf163    | -0.41144 | -2.57892 | 0.00243  |
| RG9MTD2     | -0.41227 | -2.58387 | 1.40E-04 |
| FPR2        | -0.41232 | -2.58413 | 0.0074   |
| CDCA7L      | -0.41363 | -2.59196 | 0.00354  |
| ARHGEF4     | -0.41373 | -2.59257 | 2.50E-04 |
| MTHFD1L     | -0.41642 | -2.60869 | 2.80E-04 |
| LOC10012911 | -0.41643 | -2.60872 | 0.00401  |
| ZNF177      | -0.41745 | -2.61484 | 0.00231  |
| CENPW       | -0.41937 | -2.62645 | 0.00202  |
| PTPRK       | -0.41988 | -2.62953 | 0.00175  |
| SERAC1      | -0.42094 | -2.63596 | 0.00531  |
| PRKAR1B     | -0.42094 | -2.63599 | 7.10E-04 |
| ZNF273      | -0.42145 | -2.63908 | 0.0013   |
| KCTD1       | -0.42268 | -2.64654 | 0.00701  |
| CYP2J2      | -0.42315 | -2.64943 | 9.72E-08 |
| ARHGEF5     | -0.42339 | -2.6509  | 0.00933  |
| KCTD13      | -0.4236  | -2.65214 | 0.0027   |
| TCEA3       | -0.42378 | -2.65327 | 3.74E-08 |
| PRELID2     | -0.42586 | -2.666   | 0.00831  |
| STIL        | -0.42595 | -2.66657 | 0.00302  |
| TMEM106A    | -0.42632 | -2.66884 | 7.72E-06 |
| IER3        | -0.42672 | -2.67131 | 0.00589  |
| FAM106C     | -0.43106 | -2.69812 | 0.00733  |
| HMGB3P1     | -0.43132 | -2.69975 | 0.0051   |
| ATG9B       | -0.43319 | -2.71137 | 0.00204  |
| ZNF850      | -0.43387 | -2.71563 | 0.00361  |
| SLC4A8      | -0.43405 | -2.71674 | 4.70E-04 |
| MEIG1       | -0.43554 | -2.72606 | 0.00161  |
| SNN         | -0.43576 | -2.7275  | 1.35E-07 |
| MBP         | -0.43581 | -2.7278  | 0.0065   |
| ZNF239      | -0.4361  | -2.72959 | 0.00653  |
| RHEB        | -0.43722 | -2.73667 | 0.0046   |

|             |          |          |          |
|-------------|----------|----------|----------|
| TRIM34      | -0.43724 | -2.73679 | 0.00146  |
| KIAA0556    | -0.43738 | -2.73766 | 0.00161  |
| DENND5A     | -0.43799 | -2.74153 | 3.91E-13 |
| C15orf29    | -0.43838 | -2.744   | 0.00278  |
| GGTA1       | -0.44186 | -2.76607 | 0.00695  |
| AHI1        | -0.44294 | -2.77296 | 4.00E-05 |
| KRTCAP3     | -0.44562 | -2.79008 | 5.80E-04 |
| NCRNA00282  | -0.44703 | -2.79914 | 0.00341  |
| LOC10013106 | -0.44866 | -2.80972 | 0.0014   |
| OR10G9      | -0.44954 | -2.81539 | 0.00504  |
| KCNH2       | -0.44979 | -2.817   | 9.80E-04 |
| TBC1D3B     | -0.4504  | -2.82099 | 8.90E-04 |
| GRB10       | -0.45059 | -2.82221 | 5.30E-04 |
| CH25H       | -0.45195 | -2.83106 | 0.00892  |
| GALNT2      | -0.4525  | -2.83465 | 5.00E-05 |
| RYR1        | -0.45259 | -2.83525 | 0.00262  |
| HTR7P1      | -0.45262 | -2.83546 | 0.00415  |
| SECISBP2    | -0.45278 | -2.83649 | 6.50E-04 |
| LIMS2       | -0.45289 | -2.83723 | 0.00722  |
| HLA-DOA     | -0.45374 | -2.84276 | 0.00426  |
| DPCR1       | -0.45415 | -2.84547 | 2.90E-04 |
| SGPP2       | -0.45625 | -2.85925 | 0.00582  |
| C2orf40     | -0.45707 | -2.86465 | 0.00323  |
| PTCD3       | -0.45741 | -2.86686 | 1.16E-06 |
| RWDD2B      | -0.45776 | -2.86919 | 0.00665  |
| GCET2       | -0.45848 | -2.87396 | 0.0079   |
| SHMT1       | -0.46014 | -2.88496 | 0.00198  |
| FAM126A     | -0.46076 | -2.88911 | 6.80E-04 |
| SLC39A9     | -0.46201 | -2.89743 | 0.00398  |
| RFPL1       | -0.46269 | -2.90195 | 4.80E-04 |
| SEMA4B      | -0.46522 | -2.91889 | 0.00239  |
| ZNF202      | -0.46613 | -2.92505 | 3.40E-04 |
| FAM169A     | -0.46831 | -2.93972 | 5.86E-10 |
| AGBL5       | -0.46984 | -2.95015 | 0.00664  |
| HMMR        | -0.47211 | -2.96558 | 8.20E-04 |
| ADAMTS4     | -0.47215 | -2.96586 | 0.00576  |
| FADS3       | -0.47232 | -2.96702 | 2.00E-05 |
| CEP55       | -0.473   | -2.97165 | 0.00184  |
| MGP         | -0.47662 | -2.99656 | 2.10E-04 |
| KIF11       | -0.47705 | -2.99951 | 0.00146  |
| ACTN3       | -0.47889 | -3.01223 | 3.40E-04 |
| AXIN2       | -0.47947 | -3.01628 | 4.00E-05 |
| B3GNT9      | -0.48146 | -3.03009 | 5.70E-06 |
| TMEM184C    | -0.4824  | -3.03666 | 0.00176  |
| CCNB1       | -0.48325 | -3.04261 | 3.00E-05 |
| POU5F2      | -0.48384 | -3.0468  | 0.00415  |
| CEBPE       | -0.48595 | -3.06163 | 0.00687  |
| ZSCAN22     | -0.48617 | -3.06318 | 0.00181  |
| ZNF284      | -0.48688 | -3.06819 | 0.00468  |

|            |          |          |          |
|------------|----------|----------|----------|
| RDH10      | -0.48801 | -3.07618 | 0.00402  |
| ZRANB3     | -0.48845 | -3.0793  | 2.00E-05 |
| HOXB2      | -0.4887  | -3.08104 | 0.00769  |
| SPIN3      | -0.48933 | -3.08552 | 0.00135  |
| TIAM1      | -0.49117 | -3.09862 | 1.86E-06 |
| RRM2       | -0.49143 | -3.10048 | 0.0055   |
| MGC15705   | -0.49145 | -3.10064 | 0.00635  |
| ZBTB32     | -0.4919  | -3.10385 | 0.00153  |
| GNB4       | -0.49316 | -3.11288 | 0.00159  |
| USP46      | -0.49332 | -3.11398 | 4.00E-04 |
| IGF1       | -0.49402 | -3.11907 | 0.00683  |
| PTGIR      | -0.49504 | -3.12637 | 0.00399  |
| GIT1       | -0.49555 | -3.13006 | 9.00E-05 |
| COX4I2     | -0.49598 | -3.13316 | 0.00845  |
| CDH1       | -0.49605 | -3.13367 | 3.00E-05 |
| CDK1       | -0.49736 | -3.1431  | 2.70E-04 |
| FLJ22447   | -0.49835 | -3.15026 | 6.70E-04 |
| CCDC114    | -0.49973 | -3.16032 | 0.00155  |
| ZNF257     | -0.4998  | -3.16085 | 7.00E-05 |
| KALRN      | -0.50067 | -3.16716 | 6.40E-04 |
| SPHK2      | -0.501   | -3.16958 | 0.00691  |
| CCR7       | -0.50144 | -3.1728  | 2.95E-10 |
| SLC40A1    | -0.50169 | -3.17463 | 5.73E-09 |
| NGFRAP1    | -0.50355 | -3.18824 | 6.49E-10 |
| SPDYE8P    | -0.50366 | -3.18905 | 0.00928  |
| LOC401431  | -0.50396 | -3.19127 | 8.14E-09 |
| BCAT1      | -0.50401 | -3.19162 | 0.00638  |
| ZNF827     | -0.50592 | -3.20566 | 0.00146  |
| SLC7A14    | -0.50798 | -3.22093 | 0.0068   |
| DIO3       | -0.50814 | -3.22214 | 0.0032   |
| MYO1E      | -0.51009 | -3.23663 | 0.00579  |
| OTUD4      | -0.5107  | -3.24117 | 4.34E-06 |
| C20orf177  | -0.5108  | -3.24192 | 6.70E-04 |
| MDS2       | -0.51752 | -3.29245 | 0.00907  |
| PDE4DIP    | -0.51941 | -3.30678 | 0.00359  |
| GAL3ST3    | -0.5203  | -3.31357 | 0.00605  |
| EPHA1      | -0.52365 | -3.33927 | 6.00E-05 |
| ZNF483     | -0.52417 | -3.34325 | 8.40E-04 |
| POU2AF1    | -0.52431 | -3.34433 | 0.00291  |
| SELP       | -0.52598 | -3.35725 | 0.00551  |
| SELP       | -0.52598 | -3.35725 | 0.00551  |
| LEPRE1     | -0.52683 | -3.3638  | 1.80E-04 |
| PIGW       | -0.52692 | -3.36446 | 0.00708  |
| SNAR-B1    | -0.5276  | -3.3698  | 0.00671  |
| S100A14    | -0.52895 | -3.38024 | 0.00947  |
| KCNMB4     | -0.5307  | -3.39394 | 0.00298  |
| ST6GALNAC3 | -0.53075 | -3.39431 | 0.00466  |
| C1orf94    | -0.53266 | -3.40923 | 0.00749  |
| LOC148189  | -0.53317 | -3.41329 | 0.00142  |

|             |          |          |          |
|-------------|----------|----------|----------|
| GRAP        | -0.53348 | -3.41574 | 1.00E-05 |
| NKX2-8      | -0.53506 | -3.42812 | 0.00884  |
| LEF1        | -0.53644 | -3.43907 | 2.60E-22 |
| LAT2        | -0.53877 | -3.45755 | 2.00E-05 |
| TJP2        | -0.54282 | -3.48998 | 3.00E-05 |
| ZNF836      | -0.54323 | -3.49324 | 9.90E-04 |
| VAT1L       | -0.54397 | -3.4992  | 0.00874  |
| FOXD1       | -0.54416 | -3.50075 | 8.20E-04 |
| CALCR       | -0.54705 | -3.52412 | 0.00374  |
| C1QL2       | -0.54775 | -3.52981 | 0.00775  |
| ENTPD1      | -0.54789 | -3.53095 | 0.0096   |
| BEND7       | -0.54842 | -3.53524 | 0.0051   |
| KANK1       | -0.54899 | -3.53988 | 0.00216  |
| KANK1       | -0.54899 | -3.53988 | 0.00216  |
| LOC10019237 | -0.55188 | -3.56352 | 3.60E-04 |
| MAGEB4      | -0.55336 | -3.57567 | 0.00644  |
| ZNF404      | -0.55396 | -3.58062 | 4.10E-04 |
| LOC284023   | -0.5545  | -3.58508 | 0.00489  |
| CAMSAP1L1   | -0.55547 | -3.59312 | 3.00E-05 |
| RNASE6      | -0.5555  | -3.59336 | 0.00434  |
| SETD5       | -0.55727 | -3.608   | 5.00E-05 |
| CXCR5       | -0.56119 | -3.64072 | 4.00E-05 |
| IL5         | -0.56317 | -3.6574  | 0.0038   |
| HOMER1      | -0.5655  | -3.67706 | 0.0049   |
| PLEKHA4     | -0.56654 | -3.6859  | 0.00126  |
| LOC729991   | -0.56692 | -3.68911 | 1.00E-05 |
| DEFB121     | -0.568   | -3.69827 | 0.00947  |
| FHIT        | -0.56804 | -3.6986  | 0.00175  |
| LY96        | -0.56927 | -3.70914 | 3.00E-05 |
| NEFL        | -0.56979 | -3.71356 | 0.00682  |
| FLJ45079    | -0.57221 | -3.73433 | 0.00517  |
| PSMC3IP     | -0.57355 | -3.74582 | 3.50E-04 |
| CASC5       | -0.57383 | -3.74822 | 7.00E-05 |
| ZNF135      | -0.57499 | -3.75831 | 0.00679  |
| PXDN        | -0.57526 | -3.76061 | 0.00992  |
| PXDN        | -0.57526 | -3.76061 | 0.00992  |
| ASB14       | -0.57543 | -3.76206 | 0.0033   |
| SLC16A10    | -0.57698 | -3.77554 | 8.30E-04 |
| UBD         | -0.5771  | -3.77659 | 8.00E-05 |
| MPPED1      | -0.57802 | -3.78464 | 0.00143  |
| PLXDC1      | -0.57958 | -3.7982  | 2.00E-05 |
| CELF4       | -0.58096 | -3.81032 | 0.00525  |
| CYP3A5      | -0.58277 | -3.82618 | 0.00126  |
| FREM1       | -0.58289 | -3.82726 | 0.00803  |
| SLC24A2     | -0.58475 | -3.8437  | 0.00486  |
| ASPM        | -0.58776 | -3.87041 | 0.00177  |
| EN1         | -0.5881  | -3.87344 | 8.90E-04 |
| CHRNA4      | -0.58811 | -3.87358 | 0.00428  |
| SLC22A10    | -0.58846 | -3.8767  | 0.00243  |



|             |          |          |          |
|-------------|----------|----------|----------|
| FAM74A3     | -0.58875 | -3.87923 | 0.00334  |
| LOC440934   | -0.59057 | -3.89552 | 0.00357  |
| PARP11      | -0.59094 | -3.89885 | 4.45E-06 |
| NCRNA00272  | -0.59141 | -3.90307 | 0.00265  |
| ARHGAP21    | -0.59197 | -3.90815 | 7.00E-05 |
| LOC10050754 | -0.59257 | -3.91357 | 1.90E-04 |
| SPSB1       | -0.59569 | -3.94178 | 0.0062   |
| RETN        | -0.59648 | -3.94895 | 2.50E-04 |
| LOC90586    | -0.59772 | -3.96025 | 0.00247  |
| SELL        | -0.59863 | -3.96849 | 1.33E-12 |
| CCR10       | -0.60044 | -3.98511 | 6.00E-05 |
| NCKAP5      | -0.60124 | -3.99247 | 0.00357  |
| LOC283404   | -0.60154 | -3.99521 | 0.00325  |
| LIPH        | -0.60343 | -4.01262 | 0.00204  |
| OR4C45      | -0.60399 | -4.01779 | 0.00365  |
| TMEM45B     | -0.6108  | -4.08131 | 0.00135  |
| CDCA5       | -0.61446 | -4.11584 | 8.64E-06 |
| OIP5        | -0.61629 | -4.13327 | 0.00473  |
| FLJ45983    | -0.61699 | -4.13991 | 0.00422  |
| COL1A1      | -0.62206 | -4.18854 | 0.00194  |
| LOC646268   | -0.623   | -4.19763 | 0.00255  |
| ACTN1       | -0.62376 | -4.20495 | 5.92E-10 |
| SLC22A23    | -0.62584 | -4.22516 | 0.00953  |
| NRN1        | -0.62797 | -4.24592 | 0.00149  |
| PPFIA4      | -0.62885 | -4.25448 | 0.00245  |
| TPST1       | -0.63173 | -4.28283 | 0.00136  |
| LOC388630   | -0.6339  | -4.30426 | 0.00357  |
| HDGFRP3     | -0.63788 | -4.3439  | 5.00E-05 |
| LONRF2      | -0.63839 | -4.34903 | 0.00224  |
| GPR44       | -0.63957 | -4.36086 | 3.10E-04 |
| ASPN        | -0.6407  | -4.37215 | 0.0033   |
| FBLN2       | -0.64645 | -4.43046 | 6.50E-04 |
| USP11       | -0.65106 | -4.47779 | 2.00E-05 |
| MCTP1       | -0.65422 | -4.51042 | 7.90E-04 |
| KRT24       | -0.65666 | -4.53584 | 0.00458  |
| MAGED4B     | -0.65813 | -4.55122 | 0.00121  |
| E2F1        | -0.65834 | -4.55345 | 1.94E-10 |
| DTL         | -0.65868 | -4.55699 | 9.00E-05 |
| FLJ22763    | -0.66326 | -4.60531 | 0.00199  |
| SH3PXD2A    | -0.66618 | -4.63634 | 0.00141  |
| BEND5       | -0.66977 | -4.67489 | 3.12E-06 |
| OR51A7      | -0.67399 | -4.72053 | 0.00653  |
| MYB         | -0.67532 | -4.73501 | 3.00E-05 |
| C3orf14     | -0.67682 | -4.75135 | 4.35E-07 |
| LOC729159   | -0.67724 | -4.75597 | 0.00149  |
| SLC35F4     | -0.68672 | -4.8609  | 0.008    |
| ANO7        | -0.69173 | -4.91737 | 6.00E-05 |
| FAM75D3     | -0.69333 | -4.93548 | 1.00E-04 |
| NUSAP1      | -0.69504 | -4.95494 | 3.20E-04 |

|             |          |          |          |
|-------------|----------|----------|----------|
| PDZK1IP1    | -0.69531 | -4.95804 | 4.60E-04 |
| WSCD2       | -0.6961  | -4.96711 | 9.00E-04 |
| ZWINT       | -0.70013 | -5.01339 | 3.40E-04 |
| BIRC5       | -0.7006  | -5.01879 | 0.0024   |
| ADAMTSL3    | -0.703   | -5.04661 | 0.00104  |
| FLJ46552    | -0.70425 | -5.0612  | 0.00514  |
| ADORA1      | -0.70575 | -5.07865 | 5.80E-04 |
| SPRY2       | -0.70607 | -5.0824  | 1.45E-07 |
| SLC6A13     | -0.7085  | -5.11088 | 0.00901  |
| C10orf90    | -0.71004 | -5.12909 | 1.80E-04 |
| STS         | -0.71265 | -5.15999 | 0.0033   |
| SIRPA       | -0.71343 | -5.16931 | 0.00984  |
| C3orf45     | -0.71383 | -5.17401 | 0.00364  |
| CCR8        | -0.7176  | -5.21919 | 1.24E-08 |
| LOC644662   | -0.71968 | -5.24417 | 6.20E-04 |
| FGD5        | -0.72133 | -5.26417 | 0.00637  |
| UHRF1       | -0.72254 | -5.27891 | 5.00E-04 |
| CDKN3       | -0.72867 | -5.3539  | 2.62E-12 |
| C22orf24    | -0.72978 | -5.36762 | 0.00756  |
| LOC10013117 | -0.73132 | -5.38666 | 0.00273  |
| C19orf77    | -0.73206 | -5.39587 | 0.00785  |
| TNNT2       | -0.73394 | -5.41926 | 0.00552  |
| CDT1        | -0.74155 | -5.51511 | 1.60E-04 |
| PLXNB2      | -0.74221 | -5.5235  | 0.00695  |
| FAM71F1     | -0.7424  | -5.52592 | 0.00607  |
| FAM55A      | -0.74542 | -5.56444 | 0.00422  |
| OR10W1      | -0.74843 | -5.60307 | 0.00131  |
| RFPL2       | -0.75067 | -5.63206 | 8.52E-06 |
| KIAA0101    | -0.75157 | -5.64375 | 0.00109  |
| PCDHA4      | -0.75339 | -5.66753 | 5.80E-04 |
| CFB         | -0.75582 | -5.69929 | 6.10E-04 |
| LOC440047   | -0.75676 | -5.71167 | 0.00134  |
| EEPDI       | -0.76266 | -5.78973 | 6.37E-09 |
| IFNA10      | -0.76383 | -5.80541 | 0.00164  |
| ALX1        | -0.7645  | -5.81429 | 0.00138  |
| KCTD12      | -0.77602 | -5.97062 | 4.90E-08 |
| KCTD12      | -0.77602 | -5.97062 | 4.90E-08 |
| FCRL2       | -0.79202 | -6.19475 | 0.00591  |
| TULP1       | -0.7953  | -6.24165 | 2.20E-04 |
| KCNQ1DN     | -0.79815 | -6.28282 | 0.00787  |
| INHBE       | -0.80284 | -6.3509  | 0.00587  |
| SIGLEC11    | -0.8031  | -6.35481 | 0.00827  |
| GAS2L2      | -0.80884 | -6.43932 | 0.00354  |
| GINS2       | -0.81318 | -6.50402 | 3.94E-09 |
| MXRA8       | -0.83209 | -6.79346 | 0.0042   |
| TSPYL5      | -0.83883 | -6.89974 | 2.62E-08 |
| PTCRA       | -0.83894 | -6.90144 | 0.00321  |
| GCM2        | -0.84001 | -6.91844 | 5.70E-04 |
| BDNF-AS1    | -0.84808 | -7.04825 | 0.00305  |

|             |          |           |          |
|-------------|----------|-----------|----------|
| KIAA0125    | -0.85683 | -7.19167  | 6.01E-06 |
| FLJ30679    | -0.86083 | -7.25817  | 0.00273  |
| BTBD17      | -0.86477 | -7.32436  | 0.00427  |
| LOC10013166 | -0.8668  | -7.3586   | 1.03E-08 |
| LOC389247   | -0.86713 | -7.36428  | 0.00401  |
| AEBP1       | -0.87437 | -7.48813  | 3.33E-15 |
| ZNF501      | -0.87812 | -7.55303  | 0.00264  |
| TBX3        | -0.87856 | -7.56074  | 3.59E-13 |
| LOC10013112 | -0.88041 | -7.59297  | 0.00279  |
| RTKN2       | -0.88732 | -7.71474  | 9.24E-13 |
| CCNB2       | -0.8877  | -7.72149  | 7.28E-06 |
| OR5B17      | -0.89367 | -7.82831  | 0.00176  |
| PHGDH       | -0.90209 | -7.98159  | 2.13E-11 |
| C5orf13     | -0.91129 | -8.15249  | 3.00E-08 |
| KLF7        | -0.92632 | -8.43959  | 1.71E-11 |
| AQP4        | -0.93397 | -8.58958  | 2.00E-04 |
| CENPF       | -0.94603 | -8.83147  | 3.90E-08 |
| CDKN2B      | -0.95346 | -8.98382  | 2.00E-04 |
| TRIM71      | -1.01828 | -10.42979 | 0.00105  |
| NCRNA00244  | -1.07988 | -12.01931 | 3.30E-04 |
| VSIG4       | -1.0987  | -12.55148 | 6.49E-13 |
| NOG         | -1.12596 | -13.36458 | 1.58E-09 |

| CD161+ |            |             |          |
|--------|------------|-------------|----------|
| Symbol | Log(Ratio) | Fold Change | P-value  |
| CCL20  | 2          | 100         | 0        |
| CCL3L3 | 2          | 100         | 0        |
| IFNG   | 2          | 100         | 0        |
| IL13   | 2          | 100         | 0        |
| IL2    | 2          | 100         | 0        |
| IL21   | 2          | 100         | 0        |
| IL3    | 2          | 100         | 0        |
| IL4    | 2          | 100         | 0        |
| CCL4   | 1.98057    | 95.62418    | 0        |
| IL10   | 1.89003    | 77.63063    | 0        |
| IL31   | 1.81784    | 65.74178    | 0        |
| CCL3   | 1.73401    | 54.20181    | 5.01E-35 |
| IL23A  | 1.68192    | 48.07494    | 0        |
| IL5    | 1.66374    | 46.10404    | 3.41E-14 |
| IL11   | 1.63913    | 43.56461    | 0        |
| IL22   | 1.63083    | 42.73958    | 2.31E-10 |
| IL17F  | 1.54097    | 34.75123    | 1.01E-13 |
| CXCL2  | 1.5196     | 33.08287    | 1.62E-08 |
| IL1B   | 1.50201    | 31.76928    | 1.34E-16 |
| CCL1   | 1.26355    | 18.34628    | 5.60E-07 |
| IFNA6  | 1.10063    | 12.60752    | 0.00003  |
| CXCL3  | 1.06275    | 11.55444    | 1.62E-18 |
| IFNE   | 0.87249    | 7.45581     | 3.64E-15 |
| CCL18  | 0.86631    | 7.35035     | 4.02E-13 |
| IL24   | 0.86238    | 7.28423     | 8.93E-18 |
| IFNAR2 | 0.75811    | 5.72938     | 3.71E-21 |
| IL6    | 0.68732    | 4.86764     | 3.99E-08 |
| IL17D  | 0.62571    | 4.22384     | 7.09E-09 |
| IL28A  | 0.32429    | 2.11002     | 3.95E-08 |
| IL26   | 0.30181    | 2.00358     | 6.83E-06 |
| CXCL16 | -0.31988   | -2.0887     | 1.05E-08 |
| IFNA4  | -0.40987   | -2.56963    | 2.35E-13 |
| CXCL12 | -0.51247   | -3.25441    | 1.97E-11 |
| CCL28  | -0.60662   | -4.04223    | 7.09E-10 |
| IL17C  | -0.61893   | -4.15842    | 0.00662  |
| IL29   | -0.69618   | -4.96795    | 8.88E-06 |
| IL15   | -0.84463   | -6.99245    | 1.89E-09 |
| IL32   | -0.86591   | -7.34361    | 1.67E-38 |
| CCL23  | -1.02478   | -10.58709   | 0.00125  |
| CXCL5  | -1.11002   | -12.88307   | 1.86E-43 |
| CCL24  | -1.25558   | -18.01277   | 0        |
| IL16   | -1.3737    | -23.64262   | 0        |

| <b>Symbol</b> | <b>Log(Ratio)</b> | <b>Fold Change</b> | <b>P-value</b> |
|---------------|-------------------|--------------------|----------------|
| CCL20         | 2                 | 100                | 0              |
| CCL3L3        | 2                 | 100                | 0              |
| IFNG          | 2                 | 100                | 0              |
| IL2           | 2                 | 100                | 0              |
| IL3           | 2                 | 100                | 0              |
| IL13          | 1.99905           | 99.78169           | 0              |
| IL31          | 1.99628           | 99.14742           | 0              |
| IL21          | 1.97438           | 94.27056           | 0              |
| IL10          | 1.93585           | 86.26813           | 0              |
| CXCL2         | 1.92853           | 84.82661           | 0              |
| IL4           | 1.92547           | 84.23036           | 0              |
| IL11          | 1.89813           | 79.09109           | 0              |
| CXCL3         | 1.89811           | 79.08788           | 0              |
| CCL4          | 1.86385           | 73.08866           | 0              |
| IL22          | 1.82616           | 67.01241           | 2.31E-36       |
| IL5           | 1.80205           | 63.39455           | 4.83E-28       |
| CCL1          | 1.71716           | 52.13913           | 2.18E-10       |
| IL1B          | 1.65547           | 45.23426           | 2.90E-06       |
| CCL3          | 1.57954           | 37.97852           | 2.73E-19       |
| IL23A         | 1.52115           | 33.20068           | 2.38E-44       |
| IL17F         | 1.47492           | 29.84858           | 0              |
| CCL18         | 1.32723           | 21.24357           | 3.37E-10       |
| IL9           | 1.30126           | 20.01053           | 2.79E-18       |
| IL8           | 1.28335           | 19.20236           | 8.48E-15       |
| IL24          | 1.24926           | 17.75255           | 2.86E-11       |
| IL6           | 1.24587           | 17.61463           | 4.38E-08       |
| IL26          | 1.22463           | 16.77378           | 1.96E-10       |
| IFNE          | 1.21164           | 16.2795            | 1.76E-24       |
| CXCL1         | 0.83586           | 6.85261            | 4.04E-11       |
| IL17D         | 0.76164           | 5.77623            | 9.94E-11       |
| IL12A         | 0.70531           | 5.07356            | 1.53E-15       |
| CXCL16        | 0.58975           | 3.88825            | 0.00195        |
| IL28A         | 0.52041           | 3.31447            | 0.00002        |
| CXCL13        | 0.48054           | 3.02368            | 0.00222        |
| CXCL12        | -0.41425          | -2.59567           | 0.00005        |
| IL16          | -0.44071          | -2.75873           | 0.00054        |
| IFNA4         | -0.5126           | -3.25534           | 9.10E-35       |
| IL17C         | -0.55126          | -3.55842           | 0.00089        |
| IL15          | -0.64435          | -4.40907           | 9.93E-12       |
| IL29          | -0.72757          | -5.34041           | 9.14E-08       |
| IL32          | -0.7311           | -5.38396           | 0              |
| CCL28         | -0.82803          | -6.73028           | 4.52E-17       |
| CCL24         | -0.88455          | -7.66567           | 2.92E-32       |
| IL16          | -1.20232          | -15.93365          | 4.29E-42       |
| IL16          | -1.43147          | -27.00685          | 1.51E-11       |
| CXCL5         | -1.54045          | -34.70966          | 0              |

| <b>Symbol</b> | <b>Log(Ratio)</b> | <b>Fold Change</b> | <b>P-value</b> |
|---------------|-------------------|--------------------|----------------|
| NLRP13        | 1.47134           | 29.60327           | 0.0006         |
| CAMKMT        | 1.44882           | 28.10717           | 0.00011        |
| PLCH1         | 1.42324           | 26.49952           | 0.00014        |
| TCF21         | 1.41343           | 25.90762           | 0.00011        |
| MYO16         | 1.41276           | 25.8677            | 0.00224        |
| LOC339666     | 1.39821           | 25.01582           | 0.00011        |
| ESYT3         | 1.39433           | 24.79314           | 0.00016        |
| GRM5          | 1.31368           | 20.59122           | 0.00005        |
| FLJ35424      | 1.29998           | 19.95174           | 0.00006        |
| NME5          | 1.29333           | 19.64845           | 0.00008        |
| PRO2214       | 1.27519           | 18.84458           | 0.00011        |
| SOHLH2        | 1.26099           | 18.23844           | 0.00011        |
| FOXP2         | 1.21821           | 16.52746           | 0.00003        |
| CYP4A22       | 1.21616           | 16.44996           | 0.00007        |
| PROL1         | 1.21392           | 16.36524           | 0.00012        |
| UCP1          | 1.2129            | 16.32678           | 0.00152        |
| UGGT2         | 1.16977           | 14.78313           | 0.00007        |
| GALNTL6       | 1.16783           | 14.71726           | 0.00076        |
| HERC3         | 1.16023           | 14.46217           | 0.00009        |
| ZNF311        | 1.15516           | 14.29424           | 0.00015        |
| AGXT2L1       | 1.15196           | 14.18938           | 0.00025        |
| CACNA1A       | 1.15138           | 14.17031           | 0.00033        |
| AP4S1         | 1.13613           | 13.68151           | 0.00066        |
| TP73          | 1.12146           | 13.22687           | 0.00018        |
| WFDC13        | 1.10678           | 12.78738           | 0.0004         |
| FAM188B       | 1.10117           | 12.62315           | 0.00044        |
| FRRS1         | 1.08323           | 12.11243           | 0.00044        |
| KRTAP5-3      | 1.08086           | 12.04654           | 0.00058        |
| IFNA6         | 1.07652           | 11.92665           | 0.00003        |
| LOC10028770   | 1.05996           | 11.48055           | 0.0006         |
| SORCS1        | 1.05721           | 11.40793           | 0.00087        |
| LRIG2         | 1.05001           | 11.2204            | 0.00057        |
| OR2T8         | 1.04465           | 11.08271           | 0.00132        |
| XLOC_011510   | 1.04365           | 11.0573            | 0.00126        |
| OOSP1         | 1.04162           | 11.00579           | 0.0009         |
| ZMYND12       | 1.04151           | 11.00296           | 0.00062        |
| C9orf150      | 1.03747           | 10.90103           | 0.00067        |
| GDNF          | 1.0248            | 10.58759           | 0.00337        |
| FOXL1         | 1.02117           | 10.49964           | 0.00101        |
| C8B           | 1.01237           | 10.28902           | 0.00343        |
| ZBTB49        | 1.00513           | 10.11892           | 0.00103        |
| LOC10028771   | 0.99305           | 9.84125            | 0.00068        |
| EXOC6B        | 0.99021           | 9.77706            | 0.00163        |
| DEFB135       | 0.98027           | 9.55592            | 0.0014         |
| CACNA2D3      | 0.97144           | 9.3636             | 0.00127        |
| XLOC_001851   | 0.97139           | 9.36255            | 0.00015        |
| LRFN2         | 0.95519           | 9.01975            | 0.00002        |
| ARHGAP33      | 0.95295           | 8.97317            | 0.00203        |

|             |         |         |          |
|-------------|---------|---------|----------|
| TBX22       | 0.94914 | 8.89496 | 0.00094  |
| ZC3H12B     | 0.94018 | 8.71324 | 0.00146  |
| AQP4        | 0.937   | 8.64966 | 0.00192  |
| KIAA0889    | 0.93544 | 8.61863 | 0.00025  |
| LOC10012901 | 0.93342 | 8.57873 | 0.00178  |
| TIFAB       | 0.9323  | 8.55658 | 0.00402  |
| TPRG1       | 0.91907 | 8.29983 | 0.00246  |
| NYNRIN      | 0.91525 | 8.22718 | 0.00263  |
| LOC643037   | 0.90484 | 8.03224 | 0.00311  |
| ADAM20      | 0.89902 | 7.92537 | 0.00018  |
| BACE1       | 0.89283 | 7.81319 | 0.0033   |
| XLOC_000670 | 0.88978 | 7.75847 | 0.00201  |
| LHX9        | 0.88581 | 7.68801 | 0.0031   |
| RALGPS1     | 0.88545 | 7.68151 | 0.00505  |
| IGSF11      | 0.8835  | 7.6471  | 0.00362  |
| BACE1       | 0.88019 | 7.58904 | 0.00996  |
| DPP6        | 0.87956 | 7.57806 | 0.00502  |
| CCDC36      | 0.87931 | 7.57374 | 0.00372  |
| ASCL3       | 0.87736 | 7.53983 | 0.00317  |
| NXN         | 0.87382 | 7.47852 | 0.00406  |
| LOC10019242 | 0.87306 | 7.46554 | 0.00557  |
| LOC285419   | 0.86811 | 7.3809  | 0.00429  |
| C8orf34     | 0.86789 | 7.37725 | 0.00638  |
| ALDH1A2     | 0.86545 | 7.3359  | 0.00468  |
| KC6         | 0.86544 | 7.33562 | 0.00054  |
| SLC17A2     | 0.86537 | 7.33448 | 0.00455  |
| COL5A2      | 0.864   | 7.31137 | 6.55E-07 |
| LOC10029361 | 0.86251 | 7.28631 | 0.00486  |
| IGSF1       | 0.85511 | 7.16329 | 0.00685  |
| LOC10013088 | 0.85349 | 7.13651 | 0.00694  |
| C11orf88    | 0.85259 | 7.12182 | 0.007    |
| MS4A6A      | 0.85222 | 7.11568 | 0.00095  |
| OR5AN1      | 0.85119 | 7.09884 | 0.00516  |
| PPIP5K1     | 0.84852 | 7.05535 | 0.00737  |
| SIX4        | 0.84805 | 7.04775 | 0.00729  |
| MPDZ        | 0.84603 | 7.01512 | 0.00661  |
| SLC6A15     | 0.84305 | 6.96704 | 0.00602  |
| SULT1C2     | 0.84289 | 6.96448 | 3.73E-06 |
| PRAMEF15    | 0.83704 | 6.87129 | 0.00591  |
| Q7VLF4      | 0.83622 | 6.85829 | 0.00276  |
| IPCEF1      | 0.8358  | 6.85176 | 0.00471  |
| ABCG4       | 0.82733 | 6.71935 | 0.00868  |
| OR10J1      | 0.82725 | 6.7181  | 0.00162  |
| ADAM21      | 0.82593 | 6.69782 | 0.00641  |
| LOC286189   | 0.82299 | 6.65256 | 0.00898  |
| LOC643650   | 0.81766 | 6.5714  | 0.00234  |
| KCNG4       | 0.81624 | 6.54991 | 0.00468  |
| ZBTB47      | 0.81586 | 6.54419 | 0.00146  |
| GPR22       | 0.81124 | 6.47495 | 0.00785  |

|             |         |         |         |
|-------------|---------|---------|---------|
| CRLF1       | 0.79679 | 6.26304 | 0.00514 |
| KRTAP13-2   | 0.79117 | 6.18264 | 0.00634 |
| PAX3        | 0.79029 | 6.17005 | 0.00032 |
| LOC10012832 | 0.78475 | 6.09187 | 0.00986 |
| PLA2G4F     | 0.78394 | 6.08051 | 0.00018 |
| KPNA7       | 0.78311 | 6.06887 | 0.00595 |
| LOC729178   | 0.77905 | 6.01243 | 0.00119 |
| CYP4A11     | 0.76897 | 5.87453 | 0.00219 |
| LOC729159   | 0.75832 | 5.73222 | 0.00295 |
| STK31       | 0.75116 | 5.63845 | 0.00027 |
| C9orf84     | 0.74919 | 5.61294 | 0.00717 |
| KIF5A       | 0.74669 | 5.58067 | 0.00892 |
| OR10AD1     | 0.74009 | 5.49652 | 0.00702 |
| ARHGEF11    | 0.73405 | 5.42059 | 0.0004  |
| LOC10029268 | 0.7293  | 5.36162 | 0.00828 |
| CCR9        | 0.7257  | 5.31743 | 0.00238 |
| C9orf172    | 0.72273 | 5.2812  | 0.00288 |
| GPR123      | 0.71626 | 5.20305 | 0.00101 |
| LOC729178   | 0.71541 | 5.19286 | 0.00775 |
| GUSBP1      | 0.71483 | 5.18598 | 0.0012  |
| MMP10       | 0.71411 | 5.17739 | 0.00044 |
| TRMT1L      | 0.67982 | 4.78431 | 0.00145 |
| DOC2A       | 0.6741  | 4.72177 | 0.0026  |
| LOC285191   | 0.6591  | 4.56143 | 0.0065  |
| IGJ         | 0.65767 | 4.5464  | 0.00406 |
| CCDC40      | 0.65515 | 4.52013 | 0.00077 |
| ADAMTSL2    | 0.65285 | 4.49621 | 0.00112 |
| TMEM198     | 0.61506 | 4.12156 | 0.00712 |
| LRRC16A     | 0.6121  | 4.09358 | 0.00366 |
| TRIM46      | 0.60152 | 3.99504 | 0.00841 |
| SLC30A4     | 0.59975 | 3.97878 | 0.00812 |
| TPBG        | 0.59541 | 3.93926 | 0.00092 |
| DIS3L2      | 0.59302 | 3.91763 | 0.00664 |
| LINC00478   | 0.5823  | 3.82211 | 0.0053  |
| MGC11082    | 0.57822 | 3.78635 | 0.00978 |
| HCAR1       | 0.57134 | 3.72687 | 0.00004 |
| PLP1        | 0.56905 | 3.70724 | 0.00561 |
| ITPR2       | 0.5612  | 3.64079 | 0.00273 |
| AMOTL2      | 0.56002 | 3.63093 | 0.00733 |
| SERPIN2     | 0.54916 | 3.54126 | 0.00134 |
| LOC257358   | 0.53888 | 3.45845 | 0.00495 |
| INSR        | 0.51609 | 3.28164 | 0.00963 |
| F3          | 0.51157 | 3.24769 | 0.00152 |
| IDO1        | 0.49075 | 3.09564 | 0.00574 |
| F7          | 0.48086 | 3.02597 | 0.00232 |
| NLRP4       | 0.47819 | 3.00738 | 0.00723 |
| TACR1       | 0.47326 | 2.97342 | 0.00304 |
| FLJ44511    | 0.46691 | 2.9303  | 0.00865 |
| OR8G2       | 0.46269 | 2.90195 | 0.00103 |



|             |          |          |          |
|-------------|----------|----------|----------|
| CAV1        | 0.44125  | 2.76219  | 0.00499  |
| IL1RL1      | 0.44015  | 2.75519  | 0.00111  |
| FLJ41423    | 0.42999  | 2.69147  | 0.00021  |
| IGFBP3      | 0.42449  | 2.6576   | 0.00002  |
| KREMEN2     | 0.39415  | 2.47829  | 0.00727  |
| RAPGEFL1    | 0.39367  | 2.47555  | 0.00284  |
| QPCT        | 0.37517  | 2.37233  | 0.00383  |
| CPS1-IT1    | 0.37377  | 2.36466  | 0.00771  |
| LOC338758   | 0.35514  | 2.26535  | 0.00276  |
| SLC2A13     | 0.34181  | 2.19689  | 0.00583  |
| KRTAP5-11   | 0.32925  | 2.13426  | 0.0009   |
| PGF         | 0.32637  | 2.12017  | 0.00884  |
| VSX1        | 0.31903  | 2.08463  | 0.00016  |
| ATP6V0E2    | -0.30235 | -2.00607 | 0.00593  |
| DHRS13      | -0.30548 | -2.0206  | 0.00596  |
| MMP9        | -0.30624 | -2.02414 | 0.00323  |
| ZNF250      | -0.30921 | -2.03802 | 0.00017  |
| CNN2        | -0.31    | -2.04176 | 0.00022  |
| LOC730961   | -0.31638 | -2.07194 | 0.00157  |
| FAM57A      | -0.33935 | -2.18449 | 0.00006  |
| NIPSNAP1    | -0.3412  | -2.1938  | 0.0013   |
| AIF1        | -0.34463 | -2.21122 | 0.00188  |
| AKAP12      | -0.34868 | -2.23195 | 2.38E-06 |
| CBFA2T3     | -0.35031 | -2.24031 | 0.00921  |
| PLEKHG3     | -0.35426 | -2.26078 | 0.0017   |
| SPINT2      | -0.3547  | -2.2631  | 0.00071  |
| RPS6KA5     | -0.35643 | -2.27212 | 0.00531  |
| HSD17B1     | -0.35712 | -2.27571 | 0.00867  |
| BTK         | -0.36612 | -2.3234  | 0.00408  |
| JAG2        | -0.36638 | -2.32479 | 0.00149  |
| SHMT1       | -0.36833 | -2.33521 | 0.00381  |
| LOC10013205 | -0.36932 | -2.34055 | 0.00623  |
| SETD1B      | -0.37622 | -2.37804 | 0.00033  |
| FAM123B     | -0.37779 | -2.38667 | 0.00412  |
| CORO2A      | -0.38168 | -2.40813 | 0.00569  |
| TMEM133     | -0.38343 | -2.41783 | 0.00844  |
| FLJ42022    | -0.38658 | -2.43544 | 0.00048  |
| VPS37A      | -0.39745 | -2.4972  | 0.00112  |
| LSS         | -0.39931 | -2.5079  | 0.00389  |
| HEATR4      | -0.40088 | -2.51699 | 0.00105  |
| FGD4        | -0.40564 | -2.54472 | 0.00942  |
| GRIN3A      | -0.40677 | -2.55138 | 0.00275  |
| LOC10012827 | -0.41196 | -2.582   | 0.00067  |
| BEND5       | -0.41521 | -2.60139 | 0.00297  |
| MCAM        | -0.41546 | -2.60292 | 0.00029  |
| EDA         | -0.41792 | -2.6177  | 0.00381  |
| FMOD        | -0.42089 | -2.63565 | 0.00355  |
| SLC2A11     | -0.42579 | -2.66555 | 0.00059  |
| RASA2       | -0.43422 | -2.71781 | 0.00186  |

|             |          |          |          |
|-------------|----------|----------|----------|
| BIRC5       | -0.43537 | -2.72503 | 0.00567  |
| LOC10012961 | -0.43542 | -2.72535 | 0.0034   |
| NTRK1       | -0.43698 | -2.73511 | 0.00009  |
| MYEF2       | -0.44698 | -2.79885 | 0.00707  |
| MTUS1       | -0.46213 | -2.89819 | 1.27E-12 |
| DACT3       | -0.4668  | -2.92952 | 0.0075   |
| XLOC_I2_007 | -0.46946 | -2.94753 | 0.00804  |
| WHSC1       | -0.47482 | -2.98416 | 0.00008  |
| ZNF815      | -0.48391 | -3.04723 | 0.00722  |
| KAT6B       | -0.4894  | -3.08606 | 0.00063  |
| CAPN12      | -0.49812 | -3.1486  | 0.00113  |
| IL5RA       | -0.50812 | -3.22195 | 0.00337  |
| TYSND1      | -0.51191 | -3.25019 | 0.00872  |
| MTCP1       | -0.51314 | -3.2594  | 0.00732  |
| CD200R1     | -0.51455 | -3.27003 | 0.00026  |
| RNFT2       | -0.51544 | -3.2767  | 0.00391  |
| C19orf55    | -0.51861 | -3.30072 | 0.00018  |
| KPRP        | -0.52118 | -3.32033 | 0.0098   |
| KRT34       | -0.52608 | -3.35797 | 0.00535  |
| ZNF710      | -0.52919 | -3.38216 | 0.00427  |
| STAC3       | -0.53608 | -3.43622 | 0.0093   |
| INSM1       | -0.54333 | -3.49402 | 0.00041  |
| TNS1        | -0.54768 | -3.52922 | 0.00029  |
| MLL         | -0.56668 | -3.68707 | 0.00033  |
| SLC35F3     | -0.57023 | -3.71729 | 0.00343  |
| UNC45B      | -0.57542 | -3.76201 | 0.00881  |
| LOC10012978 | -0.57671 | -3.77322 | 0.00419  |
| CDH2        | -0.57719 | -3.77739 | 0.00934  |
| TBXA2R      | -0.59227 | -3.91085 | 0.00587  |
| HEATR7A     | -0.59545 | -3.93954 | 0.00771  |
| SEPT10      | -0.59962 | -3.97763 | 0.00155  |
| MPO         | -0.60391 | -4.01704 | 0.00562  |
| LOC10050712 | -0.61403 | -4.1118  | 0.00311  |
| LOC388948   | -0.61453 | -4.11651 | 0.00506  |
| C17orf104   | -0.61529 | -4.12373 | 0.00291  |
| CD79B       | -0.63056 | -4.27131 | 0.00367  |
| LOC10050619 | -0.63291 | -4.29442 | 0.00019  |
| PIK3R3      | -0.63499 | -4.3151  | 0.00091  |
| LRRIQ1      | -0.65306 | -4.49843 | 0.00924  |
| GUCY1A3     | -0.65624 | -4.53148 | 0.00878  |
| VSIG4       | -0.66438 | -4.61724 | 0.00702  |
| KIAA0101    | -0.66706 | -4.64575 | 0.00116  |
| CTSZ        | -0.67359 | -4.71616 | 0.00293  |
| PARP10      | -0.68039 | -4.7906  | 0.00466  |
| TP53I3      | -0.682   | -4.80837 | 0.00811  |
| BEGAIN      | -0.68525 | -4.84449 | 0.00785  |
| SLC35F1     | -0.68668 | -4.86047 | 0.00921  |
| WFDC8       | -0.68674 | -4.86114 | 0.00124  |
| XLOC_014101 | -0.68936 | -4.89056 | 0.00343  |

|             |          |          |         |
|-------------|----------|----------|---------|
| P2RX6       | -0.69354 | -4.93784 | 0.00811 |
| FAM83C      | -0.69442 | -4.94791 | 0.00244 |
| LHX9        | -0.71593 | -5.19911 | 0.00305 |
| ARPP21      | -0.71717 | -5.21404 | 0.0005  |
| SLC1A2      | -0.72108 | -5.2611  | 0.00565 |
| KLRG2       | -0.72493 | -5.30801 | 0.00316 |
| DNAJB7      | -0.72565 | -5.31679 | 0.00746 |
| XLOC_006486 | -0.72685 | -5.33148 | 0.00433 |
| WDR49       | -0.73795 | -5.4695  | 0.00935 |
| GADL1       | -0.74081 | -5.50571 | 0.00554 |
| GLT8D2      | -0.74133 | -5.51221 | 0.00147 |
| SUFU        | -0.74453 | -5.553   | 0.00952 |
| CLRN2       | -0.74697 | -5.58436 | 0.00334 |
| ENHO        | -0.75109 | -5.63749 | 0.00623 |
| LOC10013108 | -0.76091 | -5.76642 | 0.0052  |
| PIRT        | -0.7659  | -5.83309 | 0.00518 |
| LOC10050637 | -0.7662  | -5.8371  | 0.00307 |
| NEXN        | -0.76667 | -5.84351 | 0.001   |
| HCRT1       | -0.76682 | -5.84549 | 0.00788 |
| GABRA5      | -0.76961 | -5.88308 | 0.00005 |
| NINJ2       | -0.77051 | -5.89535 | 0.00325 |
| LGALS1      | -0.77356 | -5.93693 | 0.00111 |
| LRRC3       | -0.7779  | -5.99656 | 0.00215 |
| FLJ46257    | -0.78087 | -6.03772 | 0.00929 |
| LOC10065284 | -0.78337 | -6.0725  | 0.00345 |
| ARHGAP10L   | -0.78671 | -6.11948 | 0.00165 |
| CST2        | -0.78803 | -6.13811 | 0.00718 |
| LOC10012932 | -0.7884  | -6.14328 | 0.00388 |
| LINC00189   | -0.78877 | -6.14853 | 0.00325 |
| DPYD        | -0.7921  | -6.19581 | 0.00669 |
| ACSS3       | -0.79464 | -6.23217 | 0.00497 |
| FAHD1       | -0.80036 | -6.31482 | 0.00058 |
| CYCSP52     | -0.80651 | -6.40482 | 0.00093 |
| OTOG        | -0.81012 | -6.45833 | 0.00493 |
| SAG         | -0.81212 | -6.48817 | 0.0067  |
| C21orf58    | -0.81278 | -6.49803 | 0.00196 |
| COX15       | -0.81506 | -6.53222 | 0.00074 |
| SLC6A20     | -0.8162  | -6.54943 | 0.00558 |
| C1orf88     | -0.81778 | -6.57326 | 0.00415 |
| LOC10013065 | -0.82238 | -6.6433  | 0.00658 |
| DCAF12L1    | -0.82495 | -6.68268 | 0.00217 |
| C4orf26     | -0.82696 | -6.71368 | 0.00066 |
| ENO4        | -0.8274  | -6.72044 | 0.00399 |
| LOC10028732 | -0.8327  | -6.80303 | 0.00016 |
| AADAT       | -0.83403 | -6.82381 | 0.00455 |
| DIRC3       | -0.84104 | -6.93492 | 0.00535 |
| TRIM17      | -0.84257 | -6.95932 | 0.00038 |
| CYP26C1     | -0.84314 | -6.96859 | 0.00245 |
| LOC10050547 | -0.84495 | -6.99758 | 0.00325 |

|             |          |           |         |
|-------------|----------|-----------|---------|
| TMEM231     | -0.84625 | -7.01859  | 0.00417 |
| SLC22A3     | -0.85293 | -7.12744  | 0.00725 |
| LINC00482   | -0.85465 | -7.15575  | 0.00253 |
| HELT        | -0.85516 | -7.16403  | 0.0018  |
| ABCG2       | -0.85842 | -7.21812  | 0.00655 |
| LOC653712   | -0.86439 | -7.31802  | 0.00144 |
| OR2F1       | -0.86668 | -7.3566   | 0.00259 |
| HSFX1       | -0.86679 | -7.35848  | 0.00142 |
| VWF         | -0.87067 | -7.42447  | 0.00264 |
| NUDT12      | -0.87085 | -7.42757  | 0.00372 |
| MARCH1      | -0.87315 | -7.46711  | 0.00177 |
| SKOR1       | -0.87323 | -7.46848  | 0.00255 |
| CACNA1E     | -0.87435 | -7.48771  | 0.00471 |
| FLJ46365    | -0.87552 | -7.508    | 0.00392 |
| LOC10050765 | -0.88228 | -7.62566  | 0.00064 |
| LRRC4B      | -0.88353 | -7.64773  | 0.00326 |
| ADAMTS4     | -0.89295 | -7.81539  | 0.00305 |
| APOF        | -0.89812 | -7.90901  | 0.00406 |
| ACY3        | -0.90525 | -8.03991  | 0.00636 |
| PRAMEF5     | -0.90805 | -8.09181  | 0.0027  |
| WNK2        | -0.91165 | -8.15918  | 0.00143 |
| CCR2        | -0.9126  | -8.17715  | 0.00328 |
| TMEFF2      | -0.9144  | -8.21105  | 0.00527 |
| LOC286087   | -0.91561 | -8.234    | 0.00011 |
| TPD52       | -0.91564 | -8.23448  | 0.00166 |
| KCND3       | -0.91647 | -8.25032  | 0.00418 |
| FBXL7       | -0.9172  | -8.26419  | 0.00054 |
| CSN1S2AP    | -0.92033 | -8.32402  | 0.00333 |
| NETO1       | -0.92458 | -8.40581  | 0.0053  |
| AMZ1        | -0.92506 | -8.41512  | 0.00147 |
| OR2T10      | -0.93206 | -8.55181  | 0.00133 |
| NAALADL2    | -0.93997 | -8.70908  | 0.00475 |
| SPINK5      | -0.94669 | -8.84474  | 0.00349 |
| CD1E        | -0.94998 | -8.91206  | 0.00427 |
| LOC728431   | -0.95019 | -8.91631  | 0.00086 |
| C4orf37     | -0.9512  | -8.93725  | 0.00054 |
| RPS6KL1     | -0.9513  | -8.93931  | 0.00326 |
| PABPC1L2B   | -0.96187 | -9.15943  | 0.00103 |
| ARHGEF33    | -0.96344 | -9.19264  | 0.00095 |
| SEMG2       | -0.96402 | -9.20492  | 0.00469 |
| C6orf38     | -0.96639 | -9.25536  | 0.00106 |
| HSPB9       | -0.97069 | -9.34748  | 0.00307 |
| LOC10050719 | -0.97358 | -9.40984  | 0.00344 |
| OR4C13      | -0.98202 | -9.59446  | 0.00301 |
| PAR4        | -0.98981 | -9.7681   | 0.00135 |
| PSMB11      | -0.99468 | -9.8783   | 0.00003 |
| VWDE        | -0.99874 | -9.97092  | 0.00003 |
| ADCY8       | -1.00113 | -10.02605 | 0.00363 |
| RGL3        | -1.00535 | -10.12396 | 0.00094 |

|             |          |           |          |
|-------------|----------|-----------|----------|
| SYT8        | -1.01212 | -10.28291 | 8.80E-08 |
| OSM         | -1.0181  | -10.42559 | 0.00162  |
| GPR128      | -1.02619 | -10.62158 | 0.00049  |
| FLJ41455    | -1.03142 | -10.75025 | 0.00062  |
| LOC10012988 | -1.03232 | -10.7727  | 0.00067  |
| XLOC_011548 | -1.04679 | -11.1376  | 0.00047  |
| LHX2        | -1.05239 | -11.2821  | 0.00036  |
| DAZ1        | -1.05618 | -11.38104 | 0.00038  |
| RNU105B     | -1.05697 | -11.40167 | 0.00056  |
| SCG5        | -1.06548 | -11.6274  | 0.00604  |
| RIMS1       | -1.09534 | -12.45492 | 0.00015  |
| HOXA6       | -1.09871 | -12.55187 | 0.00101  |
| LOC10013186 | -1.10293 | -12.6746  | 0.00109  |
| C14orf48    | -1.10423 | -12.71255 | 0.00039  |
| BOD1P       | -1.10791 | -12.82075 | 0.00035  |
| SNX31       | -1.12327 | -13.28235 | 0.00086  |
| P39189      | -1.13119 | -13.52649 | 0.00044  |
| ZYG11A      | -1.13568 | -13.66731 | 0.00244  |
| TRPM8       | -1.14264 | -13.88786 | 0.00029  |
| TTLL7       | -1.16483 | -14.616   | 0.00029  |
| NTM         | -1.16495 | -14.61994 | 0.00073  |
| C16orf47    | -1.16995 | -14.78949 | 0.00027  |
| UGT1A6      | -1.19742 | -15.75496 | 0.00018  |
| EDDM3B      | -1.2504  | -17.79919 | 0.00015  |
| ADAMTSL2    | -1.26173 | -18.26951 | 0.00022  |
| OR10H1      | -1.26816 | -18.54226 | 0.00025  |
| LOC728093   | -1.2702  | -18.62947 | 0.00028  |
| FCAMR       | -1.27518 | -18.84422 | 0.00504  |
| ARHGEF4     | -1.29497 | -19.72275 | 0.00026  |
| LOC10050617 | -1.31325 | -20.57087 | 0.0001   |
| PRAMEF15    | -1.32258 | -21.01755 | 0.00016  |
| LOC10012855 | -1.32649 | -21.20749 | 0.00048  |
| LOC10050716 | -1.32683 | -21.22396 | 0.00158  |
| TTY18       | -1.42431 | -26.56514 | 0.00096  |
| ZNF804B     | -1.43288 | -27.09422 | 0.00095  |
